# Supplementary material for: The effect of guided self-determination on self-management in persons with type 1 diabetes mellitus and HbA1c ≥64 mmol/mol: a group-based randomised controlled trial
Source: PubMed Central journal article supplement — BMJ Open. 2017 Jul 3;7(6):e013295. doi: 10.1136/bmjopen-2016-013295 (PMC5734217; doi:10.1136/bmjopen-2016-013295), 2017-07-03
Supplement: bmjopen-2016-013295.draft_revisions.pdf [file bmjopen-2016-013295.draft_revisions.pdf]

# BMJ Open

## The effect of Guided Self-Determination on self-management in persons with Type 1 diabetes mellitus and HbA1c $\geq$ 64 mmol/mol – a group-based randomized controlled trial

|                                 |                                                                                                                                                                                                                                                                                                                                                                                                  |
|---------------------------------|--------------------------------------------------------------------------------------------------------------------------------------------------------------------------------------------------------------------------------------------------------------------------------------------------------------------------------------------------------------------------------------------------|
| Journal:                        | <i>BMJ Open</i>                                                                                                                                                                                                                                                                                                                                                                                  |
| Manuscript ID                   | bmjopen-2016-013295                                                                                                                                                                                                                                                                                                                                                                              |
| Article Type:                   | Research                                                                                                                                                                                                                                                                                                                                                                                         |
| Date Submitted by the Author:   | 08-Jul-2016                                                                                                                                                                                                                                                                                                                                                                                      |
| Complete List of Authors:       | Mohn, Jannike; Hogskolen i Bergen, Centre for Evidence-Based Practice<br>Graue, Marit; Bergen Univ Coll<br>Assmus, Jörg; Haukeland Universitetssjukehus<br>Zoffmann, Vibeke; University Hospital of Copenhagen<br>Thordarson, Hrafnkell; Haukeland Universitetssjukehus<br>Peyrot, Mark; Loyola University Maryland<br>Rokne, Berit; Universitetet i Bergen Det medisinsk-odontologiske fakultet |
| <b>Primary Subject Heading</b>: | Diabetes and endocrinology                                                                                                                                                                                                                                                                                                                                                                       |
| Secondary Subject Heading:      | Patient-centred medicine, Communication                                                                                                                                                                                                                                                                                                                                                          |
| Keywords:                       | General diabetes < DIABETES & ENDOCRINOLOGY, self-management, diabetes distress, educational method, psychological functioning, HbA1c                                                                                                                                                                                                                                                            |
|                                 |                                                                                                                                                                                                                                                                                                                                                                                                  |

SCHOLARONE™  
Manuscripts

1  
2  
3 The effect of Guided Self-Determination on self-management in  
4 persons with Type 1 diabetes mellitus and  $HbA_{1c} \geq 64$  mmol/mol – a  
5 group-based randomized controlled trial  
6  
7

8 Running head:  
9

10 Effect of a behavioral intervention among adults with poorly regulated Type 1 DM  
11  
12  
13

14 Jannike Mohn, RN./Master of Health Science<sup>1\*2 5</sup>

15 M. Graue, RN./PhD<sup>1 6</sup>

16 J. Assmus, PhD<sup>3</sup>

17 V. Zoffmann, RN./PhD<sup>4</sup>

18 H. Thordarson, MD.<sup>5</sup>

19 M. Peyrot, PhD<sup>1 7</sup>

20 B. Rokne, RN./PhD<sup>2 8</sup>  
21  
22  
23  
24  
25  
26

27 <sup>1</sup>*Bergen University College, Centre for Evidence-Based Practice, Norway*

28 <sup>2</sup>*University of Bergen, Department of Global Public Health and Primary Care, Norway*

29 <sup>3</sup>*Haukeland University Hospital, Centre for Clinical Research, Norway*

30 <sup>4</sup>*Research Unit Women's and Children's Health, The Juliane Marie Centre, Copenhagen*  
31 *University Hospital, Rigshospitalet, Copenhagen, Denmark*

32 <sup>5</sup>*Haukeland University Hospital, Dept. of Medicine, Section of Endocrinology, Norway*

33 <sup>6</sup>*Haukeland University Hospital, Dept. of Pediatrics, Norway*

34 <sup>7</sup>*Department of Sociology, Loyola University Maryland, Baltimore, MD, USA*

35 <sup>8</sup>*Haukeland University Hospital, Dept. for Research and Development, Norway*  
36  
37  
38  
39  
40  
41  
42

43 \*Corresponding author:  
44

45 Jannike Mohn

46 E-mail: [jmo@hib.no](mailto:jmo@hib.no) or [jmoh@helse-bergen.no](mailto:jmoh@helse-bergen.no)

47 Mailing address: Bergen University College, Centre for evidencebased practice,  
48

49 P.O box 7030,  
50

51 N-5063 Bergen, Norway  
52

53 Phone: + 47 55 58 75 00 or Mobile +47 91 71 91 54  
54  
55  
56  
57  
58  
59  
60

## Abstract

**Objectives:** To examine the impact of Guided Self-Determination (GSD) applied in group training (GSD-GT) in poorly controlled Type 1 diabetes mellitus (DM) hypothesising GSD-GT was superior to 'care as usual' in improving HbA<sub>1c</sub> and psychological functioning.

**Setting:** An out-patient clinic at a university hospital in Western Norway.

**Participants:** 178 adults (all Caucasian) aged 18-55 (mean age 36.7 ±10.7, 62% women) with Type 1 DM for at least one year and HbA<sub>1c</sub> ≥ 64 mmol/mol (8.0%) were randomly assigned to participate in either GSD-GT (*n* = 90) or a control group (*n* = 88). Among participants allocated to the GSD-GT 48 completed the study, whereas 83 in the CG. Exclusion criteria were severe co-morbidity, major psychiatric disorder, cognitive deficiency/language barriers and pregnancy.

**Intervention:** Intervention group met 7 times for 2 hours over 14 weeks to promote patient autonomy and intrinsic motivation using reflection sheets and advanced professional communication in accordance with the GSD methodology.

**Primary and secondary outcome measures:** The primary outcome was 9-month post-intervention HbA<sub>1c</sub>; secondary outcomes were self-monitored blood glucose (SMBG) frequency, self-reported diabetes competence (PCDS), autonomy support by health-care providers (HCCQ), autonomous versus controlled diabetes motivation (TSRQ), diabetes distress (PAID and DDS), self-esteem (RSES) and psychological well-being (WHO-5 scale).

**Results:** With 95% confidence intervals (CI) GSD-GT did not have effect on HbA<sub>1c</sub> (B -0.18, CI (-0.48, 0.12), *p*=0.234). GSD-GT improved autonomy-motivated behaviour (B 0.51, CI (0.25, 0.77), *p*<0.001), diabetes distress (PAID, B -6.96, CI (-11.40, -2.52), *p*=0.002; total

1  
2  
3 DDS, B -5.15, CI (-9.34, -0.96),  $p=0.016$ ; DDS Emotional burden, B -7.19, CI (-13.20, -1.19)  
4  
5  $p=0.019$ ) and self-esteem (B 1.43, CI (0.34, 2.52),  $p=0.011$ ).  
6

7 Conclusions: Although this behavioral intervention exhibited feasibility challenges and did  
8  
9 not improve medical outcomes, psychological outcomes improved, especially reduced  
10  
11 diabetes distress.  
12

13  
14 Trial registration: Clinical Trials.gov with identification number NCT 01317459.  
15  
16  
17  
18  
19  
20  
21  
22  
23  
24  
25  
26  
27  
28  
29  
30  
31  
32  
33  
34  
35  
36  
37  
38  
39  
40  
41  
42  
43  
44  
45  
46  
47  
48  
49  
50  
51  
52  
53  
54  
55  
56  
57  
58  
59  
60

1  
2  
3 **Article summary:**  
4

5  
6 Strengths and limitations of this study  
7

- 8 • This study evaluated the effect of a person-centered behavioral intervention among adults  
9 with Type 1 DM, scarcely evaluated in the literature compared to educational programmes  
10 among persons with Type 2 DM  
11  
12  
13  
14 • Targeting persons with poorly regulated Type 1 DM is a challenge because long-standing  
15 poor glycaemic control appears to be a complex and heterogenous phenomenon  
16  
17  
18  
19 • The most obvious limitation of this study is that generalizability might be distorted due to  
20 recruitment problems, and attrition from the GSD-GT program  
21  
22  
23  
24  
25  
26  
27  
28  
29  
30  
31  
32  
33  
34  
35  
36  
37  
38  
39  
40  
41  
42  
43  
44  
45  
46  
47  
48  
49  
50  
51  
52  
53  
54  
55  
56  
57  
58  
59  
60

## Introduction

Diabetes is considered a demanding condition requiring complex self-management tasks for the individual. Effective self-management is a prerequisite for preventing long-term complications and the immediate risk of hypoglycaemia. Researchers underscore that diabetes self-management education is an ongoing process rather than a one-time event [1]. American Diabetes Association (ADA) National Standards for Diabetes Self-management Education and Support hold that self-management does not stop when a person with diabetes leaves the educator's office [2]. Consequently, motivation is a key concept, and one based on respect for the individual's autonomy is essential as it is connected with success in reaching and maintaining goals [3]. Therefore, the challenge for health-care professionals (HCPs) is to implement an autonomy supportive approach instead of one based on control or disclaimed responsibility [4]. Considerable barriers to such an approach exist [5] and personal problems in living with the illness might remain unclarified and unresolved [6]. This can contribute to the 37-56% of people with Type 1 DM who are living with blood sugar above target levels [7] and at increased risk of late complications together with poor quality of life [8]. The ADA states that diabetes care is often suboptimal. Lacking are collaborative, multidisciplinary teams well suited to provide appropriate self-management education among persons with diabetes [9].

While many trials have evaluated the effect of diabetes education programs in Type 2 DM [10], there is still a paucity of trials evaluating evidence-based self-management programmes promoting empowerment in adults with Type 1 DM [11]. Among persons with Type 1 DM the DAFNE (Dose Adjustment for Normal Eating) education programme showed significant improvements in HbA<sub>1c</sub> in the early stage of the trial [12] but more modest longer-term improvements [13]. In an uncontrolled evaluation of the DTTP (Diabetes Teaching and

1  
2  
3 Treatment Programme) persons with moderately controlled Type 1 DM improved their HbA<sub>1c</sub>  
4  
5 and treatment satisfaction [14].  
6

7  
8 Guided Self-Determination (GSD) is a theory- and evidence-based problem-solving method  
9  
10 to overcome barriers to collaborative care. It is based on life skills theory, dynamic  
11  
12 judgement-building and theories about behaviour change. GSD promotes patient autonomy,  
13  
14 participation, skills building and intrinsic motivation. The method is applicable in group  
15  
16 training or individual care for a variety of conditions. In a recent study GSD improved  
17  
18 physical well-being in women surgically treated for gynaecological cancer [15]. For persons  
19  
20 with Type 1 DM the GSD methodology has demonstrated some success. The first randomized  
21  
22 controlled trial among adults showed significant improvement in glycaemic control and life-  
23  
24 skills [16]. In later studies GSD proved to be either borderline effective or not effective  
25  
26 concerning glycaemic control among younger adults/adolescents; however, it reduced  
27  
28 diabetes distress and lack of motivation and improved diabetes competence among young  
29  
30 adult women [17, 18]. In addition, a case report on a young woman showed considerable  
31  
32 reduction in HbA<sub>1c</sub> after a GSD intervention [19]. Thus, GSD seems worthy of further  
33  
34 research. This randomized intervention study seeks to test whether GSD is superior to ‘care as  
35  
36 usual’ (CU) in improving glycaemic control and psychological functioning.  
37  
38  
39  
40

## 41 **PATIENTS AND METHODS**

### 42 **Design**

43  
44  
45  
46  
47 This study was a prospective, randomized trial with two treatment groups. Participants were  
48  
49 recruited from an out-patient setting at a university hospital in Western Norway. The  
50  
51 hospital’s population is ethnically homogeneous, and includes both urban and rural  
52  
53 populations. To test the effect of GSD persons with Type 1 DM and suboptimal metabolic  
54  
55 control were invited to participate in an educational group treatment intervention (GSD  
56  
57  
58  
59  
60

1  
2  
3 Group-Training, GSD-GT) or care as usual control group, (CG). The Regional Committee for  
4  
5 Medical and Health Research Ethics approved the study (approval number 2010/1325), and  
6  
7 gave access to the age, gender and HbA<sub>1c</sub> of non-responders. Participants gave written  
8  
9 informed consent.  
10

## 11 12 **Recruitment**

13  
14  
15 From February 2011 to March 2013 all persons with Type 1 DM attending consultations at  
16  
17 the university hospital (n=561) were assessed for eligibility according to the inclusion criteria  
18  
19 (Fig. 1).  
20  
21  
22  
23  
24  
25  
26  
27  
28  
29  
30  
31  
32  
33  
34  
35  
36  
37  
38  
39  
40  
41  
42  
43  
44  
45  
46  
47  
48  
49  
50  
51  
52  
53  
54  
55  
56  
57  
58  
59  
60



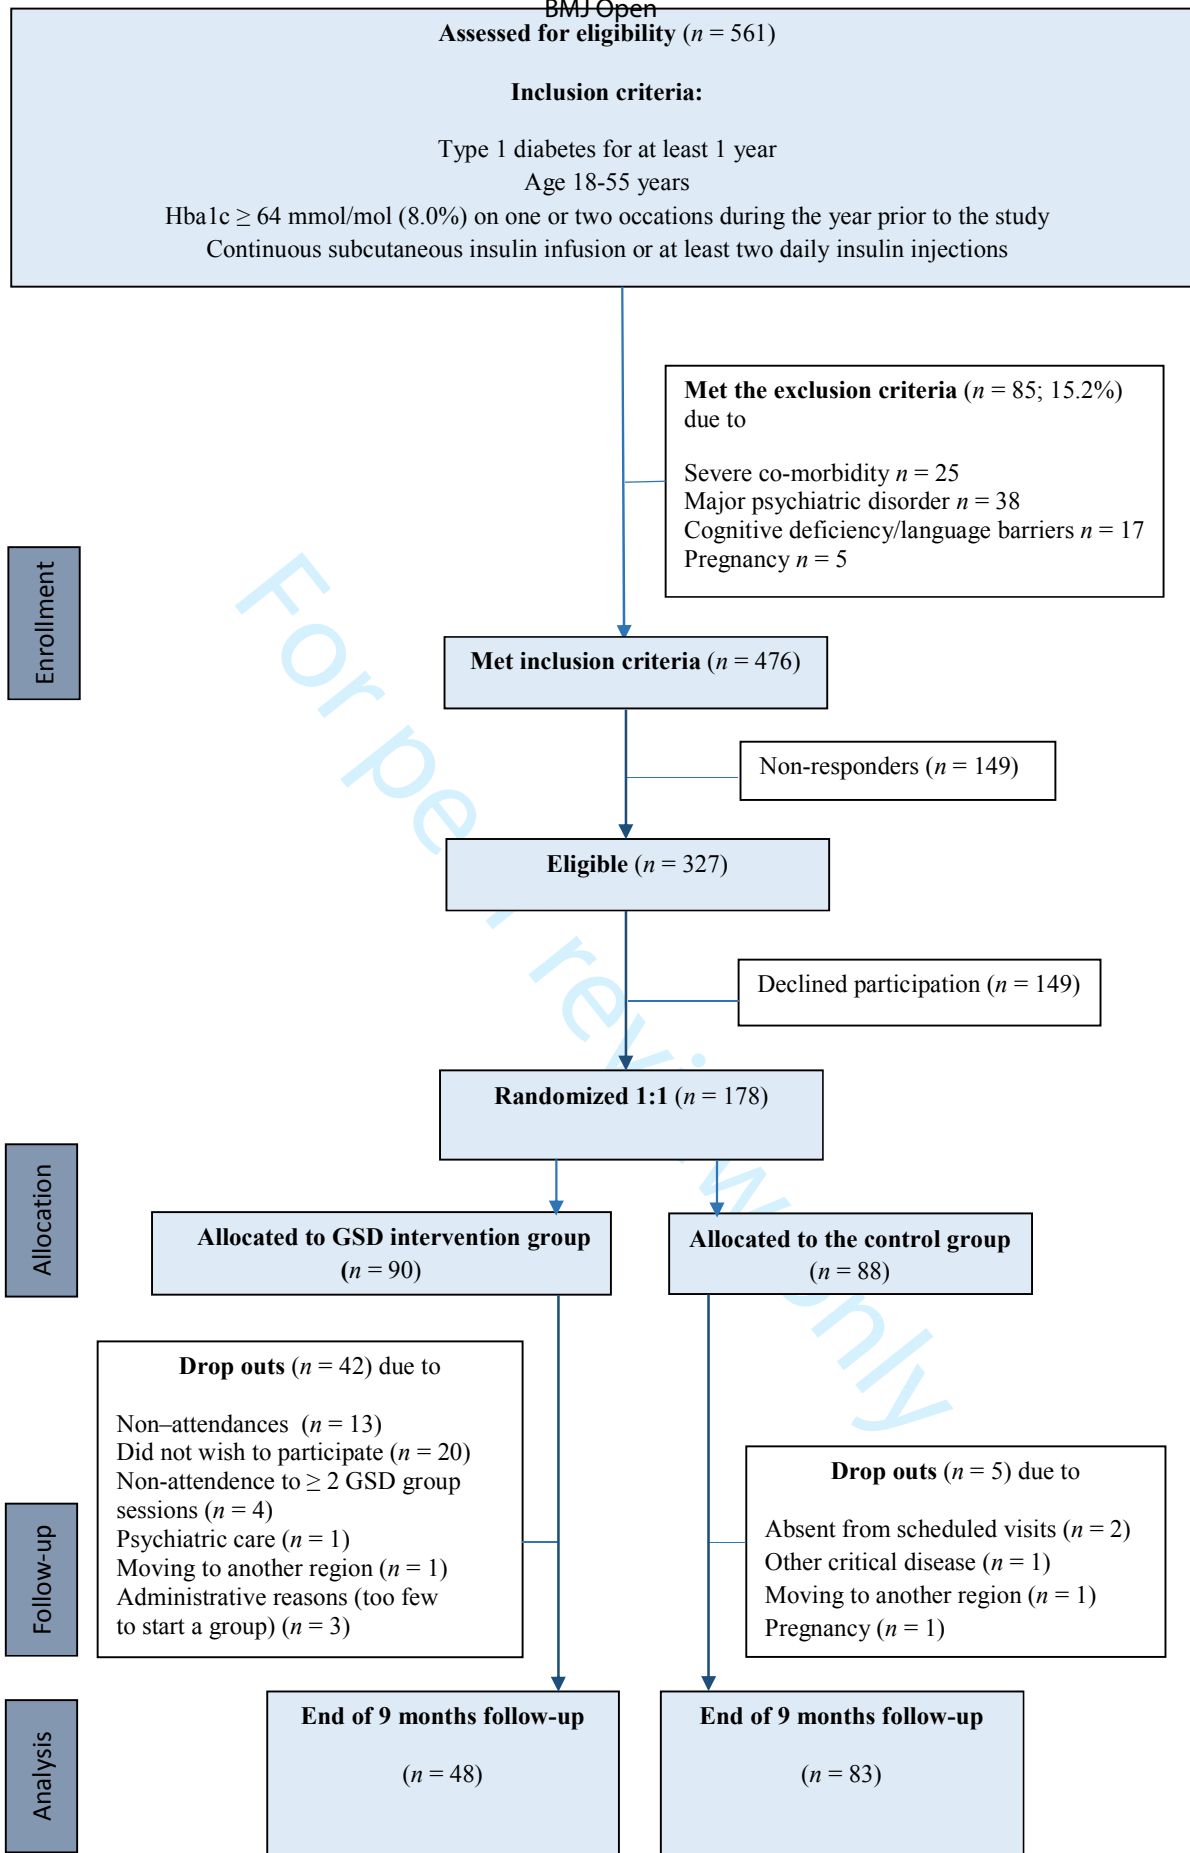

Fig 1. Study flow diagram. <http://bmjopen.bmj.com/site/about/guidelines.xhtml>

1  
2  
3 After identifying 476 people who met study criteria a request was sent by post 1-3 weeks in  
4 advance of their next clinical consultation, inviting them to take part in the study. To those  
5 who neither responded to the request nor attended at the clinic appointment an additional  
6 letter was sent. If still no response nor attendance at the clinic, they were classified as non-  
7 responders (n = 149). Another 149 persons actively declined participation. Their response was  
8 given when they were at the clinic, or by telephone if they were unable to meet for their  
9 scheduled appointment. Those willing to participate were consented when they were at the  
10 clinic (n = 178). The participation rate in the study was 37.4% (178 of the 476 who met  
11 inclusion criteria). Participants received no monetary incentives. All sessions were free of  
12 charge.  
13  
14  
15  
16  
17  
18  
19  
20  
21  
22  
23

### 24 25 **Randomization**

26  
27  
28 The randomization occurred externally and was stratified in computer-generated sequences  
29 unknown to the investigators. Blinding was considered impossible due to the nature of the  
30 intervention and was not attempted. Participants were randomized to either the usual care CG  
31 (n = 88; M/W: n = 40/48) or GSD-GT (n = 90; M/W: n = 26/64). The groups consisted of a  
32 minimum of two and a maximum of seven participants. Each GSD training group was  
33 balanced according to sex and age, preferably an equal number of men and women in each  
34 group and age ranging  $\pm$  6 years.  
35  
36  
37  
38  
39  
40  
41  
42  
43

44 In the CG and GSD-GT conditions five and forty-two participants were lost to follow-up,  
45 respectively; thus 131 participants (74%) completed the trial. The reasons for drop-out in both  
46 study groups, and the total flow of participants through each stage of the trial is depicted in  
47 Fig. 1.  
48  
49  
50  
51  
52  
53  
54  
55  
56  
57  
58  
59  
60

## Intervention

The GSD intervention was based on a technique by which the HCPs encourage people with diabetes to reflect on different problem areas concerning their daily lives with diabetes and develop autonomous motivation for life style changes. The technique was partly built on semi-structured work sheets filled in before and between each appointment, making the people with diabetes prepared with enhanced self-insight and ability to talk about personal difficulties. The perceived obstacles and barriers were responded to by HCPs with specific communication skills who conducted each consultation consistent with the GSD methodology [16]. Intervention-group participants met 7 times for 2 hour sessions over 14 weeks. Two GSD-trained diabetes specialist nurses supervised each session. Nurses were given 1 hour per week group-based feedback to secure fidelity to the protocol. No GSD-GT participants received additional treatment during the intervention period, except two participants who needed one extra consultation because of technical problems with their insulin pumps.

The control group received traditional out-patient consultations, 'care as usual', consisting of individual counseling by nurses, physicians or dieticians, with measurements of HbA<sub>1c</sub> and advice on how to improve glycaemic control. No control-group participants met with GSD-trained nurses during the intervention period.

## Assessments

Participant characteristics were assessed at baseline. Primary and secondary outcome measurements were performed at baseline and 9 months after the last session of group intervention (GSD-GT) or 9 months after inclusion (CG).

### Primary outcome measure

The primary endpoint was glycaemic control (HbA<sub>1c</sub>) which was assessed in connection with a regularly scheduled visit at the hospital. The blood samples were analysed using high-performance liquid chromatography (DCA Vantage/Siemens, DCA 2000 and DCA 2000+/Bayer), assays standardized and calibrated against the IFCC – (International Federation of Clinical Chemists) standards [20].

### Secondary outcome measures

All participants reported the number of self-monitored blood glucose measurements (SMBGs) completed in the past two weeks in the following categories: seven or more measurements per day, one to six measurements per day, and less than daily measurements. Participants also completed seven self-report instruments assessing aspects of psychological functioning consistent with the theoretical framework of GSD.

The *Problem Areas In Diabetes scale* (PAID) measures negative emotions related to living with diabetes (range = 0-100 scale); higher scores represent greater distress [21].

The *Diabetes Distress scale* (DDS) measures the level of diabetes distress with an overall score and 4 subscales: emotional burden, regimen-related, interpersonal-related and medical care-related distress (range = 1-6); higher scores represent greater distress [22].

The *Perceived Competence for Diabetes Scale* (PCDS) assesses the degree to which persons with diabetes feel they can manage the every-day aspects of diabetes care (range = 1-7); higher scores represent greater perceived competence [23].

The *Rosenberg Self-Esteem Scale* (RSES) measures one's overall self-esteem (range = 1-4); higher scores represent better self-esteem [24].

1  
2  
3 The *World Health Organization five-item (WHO-5) Well-Being Index* measures emotional  
4 well-being (range = 0-100); higher scores represent better emotional well-being [25].  
5  
6

7  
8 The *Health Care Climate Questionnaire (HCCQ)* assesses patients' perceptions of the degree  
9 to which health-care providers are supportive of autonomy rather than controlling (range = 1-  
10 7); higher scores represent greater perceived support for autonomy [26].  
11  
12

13  
14 The *Treatment Self-regulation Questionnaire (TSRQ)* assesses the diabetes self-care practices  
15 and whether this behavior is self-motivated (autonomous/internal) or controlled (external)  
16 [27]. A relative autonomy index (TSRQ Relative Autonomy Index) was also calculated.  
17  
18  
19

20  
21 The PCDS, the HCCQ and the TSRQ were translated into Norwegian and back-translated into  
22 English by professional translators, in accordance with the WHO guidelines [28].  
23  
24  
25

## 26 27 **Statistical analysis**

28  
29  
30 Mann-Whitney U tests and  $\chi^2$  tests were used to assess randomization efficacy by testing for  
31 differences in baseline measures. To assess differential attrition members of GSD-GT who  
32 completed the study were compared to those who did not.  
33  
34

35  
36 We fitted a regression model for each outcome at 9 months to investigate the difference  
37 between intervention and control groups both unadjusted and adjusted for baseline outcome.  
38  
39 To take into account possible bias introduced by the high attrition rate in the intervention  
40 group we additionally adjusted for variables showing unbalanced attrition. We used a linear  
41 regression model for all outcomes except SMBG where a multinomial logistic model was  
42 used. We used a linear regression model to test whether change in SMBG mediated change in  
43 HbA<sub>1c</sub> and whether psychological effects were mediated by increased autonomy.  
44  
45  
46  
47

48  
49 There were no intermediate assessments of most outcomes; only HbA<sub>1c</sub> was assessed for  
50 those who did not complete the study. Therefore, per-protocol analysis was performed on all  
51  
52  
53  
54  
55

1  
2  
3 outcomes except HbA<sub>1c</sub>, where an intention-to-treat analysis was performed.

4  
5 For data analyses, the statistical software program SPSS Statistics (version 22, Chicago, IL,  
6  
7 USA 26 (SPSS Inc.) was used. Significance level was set to 0.05. Missing values were  
8  
9 handled by pairwise exclusion.  
10

## 11 12 13 **RESULTS**

### 14 15 **Baseline characteristics**

16  
17  
18 The mean age of all subjects in the study sample was 36.7 years ( $\pm 10.7$ ), the median disease  
19  
20 duration was 19 years (range = 1-46), 13.5% were unemployed, 96.6% were white and 31.5%  
21  
22 had diabetes-related complications. A comparison of the baseline characteristics between the  
23  
24 groups (without taking the attrition rate into account) suggests that the randomization was  
25  
26 successful for all parameters except sex, in that we found a significant difference in the  
27  
28 number of women assigned to the study groups (M/W in the GSD-GT:  $n = 26/64$  (29/71%)  
29  
30 versus M/W in the CG:  $n = 37/46$  (45/55%),  $p = 0.022$ ) (results not shown). Baseline  
31  
32 characteristics of the sample are presented in Table 1.  
33  
34  
35  
36  
37  
38  
39  
40  
41  
42  
43  
44  
45  
46  
47  
48  
49  
50  
51  
52  
53  
54  
55  
56  
57  
58  
59  
60

**Table 1** Baseline characteristics of Control group versus GSD Intervention group (N=173)

|                                                  | A. Control group<br>(Completers)<br><br>n=83 | B. GSD Intervention group |                                 | A vs B1  | B1 vs B2 |
|--------------------------------------------------|----------------------------------------------|---------------------------|---------------------------------|----------|----------|
|                                                  |                                              | B1<br>Follow-up<br>n=48   | B2<br>Lost to Follow-up<br>n=42 | <i>P</i> | <i>P</i> |
| <b>Participants characteristics</b>              |                                              |                           |                                 |          |          |
| Sex, women <sup>1 2</sup>                        | 46 (55.4)                                    | 35 (72.9)                 | 29 (69.0)                       | .047     | .686     |
| Age, years <sup>3 4</sup>                        | 37.2 (10.9)                                  | 36.9 (9.4)                | 36.3 (11.6)                     | .860     | .916     |
| Living alone, yes <sup>1 2</sup>                 | 17 (20.5)                                    | 5 (10.4)                  | 6 (14.3)                        | .138     | .576     |
| Education University, yes <sup>1 2</sup>         | 30 (36.1)                                    | 23 (47.9)                 | 10 (23.8)                       | .186     | .018     |
| Employed <sup>1 2</sup>                          |                                              |                           |                                 |          |          |
| - Fulltime                                       | 54 (65.1)                                    | 34 (70.8)                 | 28 (66.7)                       | .485     | .464     |
| - Part-time                                      | 16 (19.3)                                    | 10 (20.8)                 | 7 (16.7)                        |          |          |
| - Not working                                    | 13 (15.7)                                    | 4 (8.3)                   | 7 (16.7)                        |          |          |
| Diabetes duration, years <sup>3 4</sup>          | 20.6 (11.2)                                  | 18.5 (10.6)               | 18.0 (11.0)                     | .310     | .694     |
| Long-term complications, yes <sup>1 2</sup>      | 29 (34.9)                                    | 11 (22.9)                 | 15 (35.7)                       | .150     | .181     |
| Treatm.regimen, Insulin Pump, yes <sup>1 2</sup> | 37 (44.6)                                    | 16 (33.3)                 | 20 (47.6)                       | .206     | .168     |
| Severe hypoglycemia, yes <sup>1 2</sup>          | 35 (42.7)                                    | 24 (50.0)                 | 13 (31.7)                       | .419     | .081     |
| BMI <sup>3 4</sup>                               | 26.0 (4.1)                                   | 25.0 (3.6)                | 25.8 (4.0)                      | .145     | .333     |
| <b>Outcomes</b>                                  |                                              |                           |                                 |          |          |
| HbA <sub>1c</sub> , mmol/mol <sup>3 4</sup>      | 78 (12.7)                                    | 76 (10.4)                 | 81 (11.7)                       |          |          |
| HbA <sub>1c</sub> , % <sup>3 4</sup>             | 9.3 (1.2)                                    | 9.1 (1.0)                 | 9.5 (1.1)                       | .320     | .018     |
| SMBG <sup>5 1 2</sup>                            |                                              |                           |                                 |          |          |

|                                           |             |             |             |      |      |
|-------------------------------------------|-------------|-------------|-------------|------|------|
| - >=7 times per day                       | 8 (9.6)     | 8 (16.7)    | 5 (11.9)    | .439 | .627 |
| - 1-6 times per day                       | 51 (61.4)   | 29 (60.4)   | 24 (57.1)   |      |      |
| - < every day                             | 24 (28.9)   | 11 (22.9)   | 13 (31.0)   |      |      |
| PAID <sup>6 3 4</sup>                     | 35.3 (18.7) | 36.8 (19.3) | 41.6 (24.4) | .696 | .355 |
| DDS <sup>7 3 4</sup> (sumscore)           | 31.9 (16.7) | 33.1 (16.4) | 37.3 (20.9) | .643 | .340 |
| DDS Emotional burden <sup>3 4</sup>       | 36.0 (22.5) | 36.9 (25.6) | 42.3 (26.0) | .985 | .297 |
| DDS Physician distress <sup>3 4</sup>     | 17.7 (19.9) | 18.1 (18.2) | 19.7 (23.1) | .826 | .990 |
| DDS Regimen distress <sup>3 4</sup>       | 45.8 (23.7) | 44.7 (21.8) | 53.9 (25.4) | .816 | .036 |
| DDS Interpersonal distress <sup>3 4</sup> | 21.0 (20.1) | 26.1 (19.3) | 24.9 (23.2) | .101 | .577 |
| PCDS <sup>8 3 4</sup>                     | 4.5 (1.6)   | 4.4 (1.4)   | 3.9 (1.6)   | .734 | .088 |
| RSES <sup>9 3 4</sup>                     | 19.6 (5.5)  | 19.5 (5.4)  | 19.0 (6.2)  | .876 | .624 |
| WHO5 <sup>10 3 4</sup>                    | 57.6 (18.6) | 60.9 (19.8) | 57.1 (20.5) | .338 | .468 |
| HCCQ <sup>11 3 4</sup>                    | 5.1 (1.4)   | 4.9 (1.6)   | 4.8 (1.6)   | .595 | .923 |
| TSRQ Autonomy <sup>12 3 4</sup>           | 5.2 (1.1)   | 5.4 (1.0)   | 4.9 (1.3)   | .754 | .088 |
| TSRQ Control <sup>13 3 4</sup>            | 3.2 (1.3)   | 3.5 (1.2)   | 3.1 (1.2)   | .073 | .061 |
| TSRQ RAI <sup>14 3 4</sup>                | 2.0 (1.3)   | 1.8 (1.5)   | 1.8 (1.7)   | .339 | .588 |

<sup>1</sup>N (%), <sup>2</sup>Chi-square ( $\chi^2$ ), <sup>3</sup>Mean (SD), <sup>4</sup>Mann-Whitney,

<sup>5</sup>Self-Monitoring Blood Glucose, <sup>6</sup>Problem Areas in Diabetes scale, <sup>7</sup>Diabetes Distress Scale, <sup>8</sup>Perceived Competence in Diabetes Scale, <sup>9</sup>Rosenberg Self-Esteem Scale, <sup>10</sup>WHO(5)Well-being Index, <sup>11</sup>Health Care Climate Questionnaire, <sup>12</sup>Treatment Self-Regulation Questionnaire, Autonomous motivation, <sup>13</sup>Treatment Self-Regulation Questionnaire, Controlled motivation, <sup>14</sup>Treatment Self-Regulation Questionnaire, Relative Autonomy Index



1  
2  
3 Due to the considerable number of drop-outs in GSD-GT, participants were stratified into  
4 Follow-up and Lost to Follow-up. There was a statistically significant difference at baseline  
5 between CG and GSD-GT Follow-up regarding sex ( $p = 0.047$ ). The remaining baseline  
6 characteristics did not differ significantly between these groups. The analysis of attrition  
7 showed that GSD-GT Lost to Follow-up participants had poorer baseline glycaemic control  
8 than GSD-GT Follow-up participants. Similarly, there were significantly fewer persons with  
9 education at a university level in the GSD-GT Lost to Follow-up and they scored higher on  
10 diabetes distress (DDS, Subscale 3, Regimen distress) than persons in the GSD-GT Follow-up  
11 group. There were no statistically significant differences regarding the remaining baseline  
12 characteristics between these groups.  
13  
14  
15  
16  
17  
18  
19  
20  
21  
22  
23

24  
25 Among participants allocated to the CG there were no statistically significant baseline  
26 differences between those who fulfilled the trial ( $n = 83$ ) and those who were lost to follow-up  
27 ( $n = 5$ , data not shown).  
28  
29  
30

### 31 32 **Primary outcome** 33

34  
35 As seen in Table 2, HbA<sub>1c</sub> declined significantly within both groups ( $p < 0.001$ ) from baseline  
36 to the 9 month follow-up, with no significant difference between the groups.  
37  
38  
39  
40  
41  
42  
43  
44  
45  
46  
47  
48  
49  
50  
51  
52  
53  
54  
55  
56  
57  
58  
59  
60

1  
2  
3  
4  
5  
6  
7  
8  
9  
10  
11  
12  
13  
14  
15  
16  
17  
18  
19  
20  
21  
22  
23  
24  
25  
26  
27  
28  
29  
30  
31  
32  
33  
34  
35  
36  
37  
38  
39  
40  
41  
42  
43  
44  
45  
46  
47

**Table 2** Outcomes in control group and Guided-Self-Determination (GSD) intervention group (N=131)

|                                  | Within group change <sup>1</sup> |                      |         |                        |                      |         | Between groups change <sup>2,3</sup> |                     |         |                             |                     |         |
|----------------------------------|----------------------------------|----------------------|---------|------------------------|----------------------|---------|--------------------------------------|---------------------|---------|-----------------------------|---------------------|---------|
|                                  | Control group<br>Mean (SD)       |                      |         | GSD group<br>Mean (SD) |                      |         | Model 1                              |                     |         | Model 2                     |                     |         |
|                                  | Baseline<br>(n = 83)             | 9 months<br>(n = 83) | p-value | Baseline<br>(n = 48)   | 9 months<br>(n = 48) | p-value | Effect<br>size <sup>4</sup>          | B (95% CI)          | p-value | Effect<br>size <sup>4</sup> | B (95% CI)          | p-value |
| <b>Primary Outcome</b>           |                                  |                      |         |                        |                      |         |                                      |                     |         |                             |                     |         |
| HbA <sub>1c</sub> % <sup>5</sup> | 9.3 (1.2)                        | 8.9 (1.3)            | <0.001  | 9.1 (1.0)              | 8.5 (1.1)            | <0.001  | 0.005                                | -0.15 (-0.45, 0.15) | .316    | 0.007                       | -0.18 (-0.48, 0.12) | .234    |
| HbA <sub>1c</sub> mmol/mol       | 78 (12.7)                        | 74 (14.1)            |         | 76 (10.4)              | 70 (11.7)            |         |                                      |                     |         |                             |                     |         |
| <b>Secondary outcomes</b>        |                                  |                      |         |                        |                      |         |                                      |                     |         |                             |                     |         |
| <b>Medical</b>                   |                                  |                      |         |                        |                      |         |                                      |                     |         |                             |                     |         |
| PCDS <sup>6</sup>                | 4.5 (1.6)                        | 4.7 (1.5)            | .305    | 4.4 (1.4)              | 4.7 (1.6)            | .071    | 0.003                                | 0.25 (-0.18, 0.67)  | .247    | 0.003                       | 0.26 (-0.17, 0.70)  | .229    |
| HCCQ <sup>7</sup>                | 5.1 (1.4)                        | 5.0 (1.4)            | .618    | 4.9 (1.6)              | 5.0 (1.6)            | .802    | 0.000                                | 0.04 (-0.46, 0.54)  | .873    | 0.000                       | 0.03 (-0.48, 0.54)  | .904    |
| <b>Type of motivation</b>        |                                  |                      |         |                        |                      |         |                                      |                     |         |                             |                     |         |
| TSRQ <sup>8</sup> Autonomy       | 5.2 (1.1)                        | 5.1 (1.1)            | .085    | 5.4 (1.0)              | 5.6 (0.9)            | .060    | 0.067                                | 0.53 (0.28, 0.79)   | < .001  | 0.061                       | 0.51 (0.25, 0.77)   | < .001  |
| TSRQ Control                     | 3.2 (1.3)                        | 3.1 (1.3)            | .532    | 3.5 (1.2)              | 3.3 (1.1)            | .072    | 0.000                                | 0.13 (-0.13, 0.40)  | .321    | 0.000                       | 0.16 (-0.11, 0.43)  | .237    |

|                            |             |             |      |             |             |      |       |                       |      |       |                       |      |
|----------------------------|-------------|-------------|------|-------------|-------------|------|-------|-----------------------|------|-------|-----------------------|------|
| TSRQ Index                 | 2.0 (1.3)   | 1.9 (1.2)   | .364 | 1.8 (1.5)   | 2.3 (1.3)   | .014 | 0.047 | 0.40 (0.06, 0.73)     | .020 | 0.038 | 0.35 (0.01, 0.69)     | .045 |
| <b>Psychological</b>       |             |             |      |             |             |      |       |                       |      |       |                       |      |
| PAID <sup>9</sup>          | 35.3 (18.7) | 34.2 (19.6) | .488 | 36.8 (19.3) | 29.8 (18.9) | .002 | 0.038 | -6.66 (-11.03, -2.29) | .003 | 0.043 | -6.96 (-11.40, -2.52) | .002 |
| DDS <sup>10</sup> overall  | 31.9 (16.7) | 30.4 (17.5) | .323 | 33.1 (16.4) | 27.9 (16.8) | .012 | 0.022 | -4.45 (-8.62, -0.27)  | .037 | 0.033 | -5.15 (-9.34, -0.96)  | .016 |
| DDS Emotional burden       | 36.0 (22.5) | 35.7 (24.4) | .995 | 36.9 (25.6) | 35.7 (24.4) | .019 | 0.035 | -6.92 (-12.82, -1.01) | .022 | 0.042 | -7.19 (-13.20, -1.19) | .019 |
| DDS Physician distress     | 17.7 (19.9) | 17.8 (19.0) | .864 | 18.1 (18.2) | 19.3 (19.7) | .337 | 0.001 | 1.14 (-4.38, 6.66)    | .684 | 0.000 | -0.41 (-5.80, 4.98)   | .880 |
| DDS Regimen distress       | 45.8 (23.7) | 40.2 (22.1) | .005 | 44.7 (21.8) | 36.8 (22.8) | .001 | 0.015 | -4.96 (-10.55, 0.64)  | .082 | 0.018 | -5.38 (-11.07, 0.32)  | .064 |
| DDS Interpersonal distress | 21.0 (20.1) | 22.2 (21.6) | .455 | 26.1 (19.3) | 22.8 (22.3) | .383 | 0.005 | -2.20 (-8.26, 3.87)   | .475 | 0.005 | -2.24 (-8.40, 3.91)   | .472 |
| RSES <sup>11</sup>         | 19.6 (5.5)  | 18.9 (5.5)  | .027 | 19.5 (5.4)  | 20.2 (4.8)  | .267 | 0.041 | 1.30 (0.22, 2.38)     | .018 | 0.048 | 1.43 (0.34, 2.52)     | .011 |
| WHO5 <sup>12</sup>         | 57.6 (18.6) | 56.3 (21.4) | .129 | 60.9 (19.8) | 60.6 (17.4) | .960 | 0.010 | 3.58 (-2.24, 9.40)    | .226 | 0.019 | 4.97 (-0.80, 10.75)   | .091 |

<sup>1</sup>All within group change values referred as t-tests

<sup>2</sup> Model 1: Adjusted for baseline value of outcome, Model 2: Adjusted for baseline value of outcome and sex

<sup>3</sup>Regression coefficient from linear regression

<sup>4</sup>Partial  $\eta^2$

<sup>5</sup> Within group- or between group change equal for HbA<sub>1c</sub> in per cent or mmol/mol

<sup>6</sup>Perceived Competence in Diabetes Scale, <sup>7</sup>Health Care Climate Questionnaire, <sup>8</sup>Treatment Self-Regulation Questionnaire, <sup>9</sup>Problem Areas in Diabetes scale, <sup>10</sup>Diabetes Distress Scale, <sup>11</sup>Rosenberg Self-Esteem Scale, <sup>12</sup>WHO (5) Well-being Index

## Secondary outcomes

The results for all secondary outcome measures are presented in Table 2, except SMBG (Table 3). Secondary outcomes are clustered into a) medical measures, b) type of motivation and c) psychological measures.

### a) Medical measures:

The proportion of SMBG seven times per day or more increased significantly within both groups from baseline to the 9 month follow-up. There was no significant difference between groups in change at the 9-month follow-up. The change of HbA<sub>1c</sub> was not mediated by the change of SMBG ( $p=0.728$ , data not shown). Self-perceived diabetes competence (PCDS) and autonomy support from health care professionals (HCCQ) showed no significant change, neither within nor between groups.

### b) Type of motivation:

The TSRQ Relative Autonomy Index showed a significant improvement within the GSD-GT group ( $p = 0.014$ ), and a significant difference between groups in change ( $B = 0.35$ ,  $p = 0.045$ ). This finding was due primarily to a significant improvement in TSRQ Autonomy for GSD-GT relative to CG ( $B = 0.51$ ,  $p < 0.001$ ). TSRQ Control remained unchanged within both groups, with no significant difference between groups.

### c) Psychological measures:

Participants in the GSD-GT group exhibited a significant reduction in diabetes-related distress relative to the CG as measured by the PAID, the DDS overall score and the DDS Emotional burden subscale ( $B = -6.96$ ,  $p = 0.002$ ;  $B = -5.15$ ,  $p = 0.016$  and  $B = -7.19$ ,  $p = 0.019$ , respectively). In addition, a reduction in DDS Regimen distress was reported within the GSD-GT group as well as the CG; the difference in group improvement did not reach significance. The GSD-GT group showed an increase in self-esteem (RSES) relative to the CG ( $B = 1.43$ ,  $p$

1  
2  
3 = 0.011); the CG experienced a decrease in self-esteem ( $p = 0.027$ ). The level of overall well-  
4 being (WHO-5) showed no significant change, neither within nor between the study groups.  
5  
6  
7 Neither PAID, DDS Total nor RSES were significantly mediated by TSRQ Autonomy  
8  
9 ( $p > 0.070$ , data not shown).  
10  
11  
12  
13  
14  
15  
16  
17  
18  
19  
20  
21  
22  
23  
24  
25  
26  
27  
28  
29  
30  
31  
32  
33  
34  
35  
36  
37  
38  
39  
40  
41  
42  
43  
44  
45  
46  
47  
48  
49  
50  
51  
52  
53  
54  
55  
56  
57  
58  
59  
60

**Table 3** Outcomes for Self-Monitoring Blood Glucose (SMBG) in control group and Guided Self-Determination (GSD) intervention group (N=131)

|                   | Within group change <sup>1</sup> |                      |         |                      |                      |         | Between groups change <sup>2,3</sup> |         |                    |         |
|-------------------|----------------------------------|----------------------|---------|----------------------|----------------------|---------|--------------------------------------|---------|--------------------|---------|
|                   | Control group<br>n (%)           |                      |         | GSD group<br>n (%)   |                      |         | Model 1                              |         | Model 2            |         |
|                   | Baseline<br>(n = 83)             | 9 months<br>(n = 82) | p-value | Baseline<br>(n = 48) | 9 months<br>(n = 47) | p-value | OR (95% CI)                          | p-value | OR (95% CI)        | p-value |
| <b>SMBG</b>       |                                  |                      |         |                      |                      |         |                                      |         |                    |         |
| >=7 times per day | 8 (9.6%)                         | 54 (65.9%)           | <0.001  | 8 (16.7%)            | 34 (72.3%)           | <0.001  | 1.02 (0.35, 2.95)                    | 0.971   | 0.92 (0.31, 2.74)  | 0.887   |
| 1-6 times per day | 51 (61.4%)                       | 10 (12.2%)           |         | 29 (60.4%)           | 8 (17.0%)            |         | 1                                    |         | 1                  |         |
| < daily           | 24 (28.9%)                       | 18 (22.0%)           |         | 11 (22.9%)           | 5 (10.6%)            |         | 3.38 (0.65, 17.58)                   | 0.148   | 3.12 (0.57, 16.97) | 0.189   |

<sup>1</sup>All within group change values referred as Chi-square (x<sup>2</sup>)

<sup>2</sup>Model 1: Adjusted for baseline value of outcome, Model 2: Adjusted for baseline value of outcome and sex

<sup>3</sup>Odds ratio from Multinomial Logistic regression

## Discussion

Contrary to the study hypothesis, a group-based GSD programme among persons with suboptimally regulated Type 1 DM did not improve the medical outcomes (glycaemic control, frequency of SMBG, perceived competence for diabetes management, perception of healthcare professionals being supportive of patient autonomy). The hypothesis regarding improvement of psychological functioning was partly confirmed, with improvement in the level of autonomy-motivated behaviour, psychological distress and self-esteem, but not the level of overall well-being.

Long-standing poor glycaemic control appears to be a complex and heterogenous phenomenon [29] and several educational programs have been evaluated for their effectiveness for improving glycaemic control [13, 30, 31]. Some researchers indicate that evaluation studies need to better understand the complexity of variance in HbA<sub>1c</sub> [32]. The present study revealed a substantial decrease in HbA<sub>1c</sub> in both groups, with no difference between groups. It is likely that the change in CG HbA<sub>1c</sub> was driven by the ‘observer effect,’ i.e., that individuals modify or improve their behavior in response to their awareness of being observed [33]. As an additional quality of metabolic control follow-up data on mild or severe hypoglycaemia could have been evaluated, but was not assessed.

The GSD-GT intervention demonstrated a significant improvement in diabetes distress. There were no between-group differences in diabetes distress at baseline among those completing the study. Although the GSD-GT study group consisted of persons with many life resources (being young, well-educated and employed) participants still had a rather substantial level of self-reported diabetes distress (43% scoring  $\geq 40$  on the PAID scale) at baseline, comparable to previous research [17]. Our results confirm that although a behavioral intervention may not improve medical outcomes among persons with persistently poor glycaemic control, psychological outcomes may improve. This raises the possibility that if interventions resulting

1  
2  
3 in behaviour change also reduce diabetes distress, the gains in diabetes self-management  
4  
5 might be sustained over the long term, as argued by Zagarins [34].  
6

7  
8 One of the key elements of GSD is to support persons with diabetes to clarify and express  
9  
10 their unique difficulties and barriers to healthy coping. This is done by mobilizing their own  
11  
12 potential for change in interactions with autonomy supportive HCPs and by utilizing semi-  
13  
14 structured reflection sheets. Instead of being instructed by HCPs, the core principle in GSD is  
15  
16 individualized goal setting, a treatment strategy comparable to other behavioral interventions  
17  
18 [11]. In a cross-sectional study HCPs being autonomy supportive was associated with the  
19  
20 perceived level of diabetes distress mediated through the perceived level of diabetes  
21  
22 competence [35]. In the current study, and incongruent with prior research on the GSD  
23  
24 approach [16, 17], there was no change in HCP autonomy support (HCCQ) and level of  
25  
26 diabetes competence (PCDS). However, GSD increased autonomous motivation (TSRQ  
27  
28 Autonomy) and reduced diabetes distress. In terms of patient outcomes, improvement of  
29  
30 autonomous motivation for change is hypothesized to be the key mechanism; autonomy  
31  
32 support from HCPs is merely one strategy for activating that mechanism. Although the  
33  
34 mediation analysis in the current study did not confirm that increasing autonomy mediates  
35  
36 mental health benefits (PAID, DDS Total and RSES), the individual's use of reflection sheets  
37  
38 may play a more important role in GSD. This interpretation is consistent with a recently  
39  
40 published qualitative paper evaluating how a GSD approach could bring about a dramatic  
41  
42 change in a young woman's perception of her diabetes [19].  
43  
44  
45

46  
47 The most obvious limitation of this study is that generalizability might be distorted due to  
48  
49 recruitment problems, and attrition from the GSD-GT program. A pre-study power calculation  
50  
51 expecting 25% drop-out and a difference of 0.6% change in HbA1c (SD 1.3) between groups  
52  
53 yielded a power 0.80 with 218 participants. As this premise was violated, the interpretation of  
54  
55  
56  
57



1  
2  
3 the results is challenging. It remains to a certain extent unclear whether the nonsignificant  
4  
5 results are attributable to insufficient power, attrition or the effect of the intervention.

6  
7 Consistent with previous studies, targeting distressed persons with diabetes [36] seems to be  
8  
9 difficult because those with the greatest need for psychological support are most likely to drop  
10  
11 out of the psychological intervention. Conversely, those who completed the study had lower  
12  
13 levels of diabetes distress and HbA<sub>1c</sub> at baseline, reflecting less need for improvement of  
14  
15 competence to manage the every-day aspects of their diabetes care. Perhaps future research on  
16  
17 behavioral interventions, especially GSD, should assess patient interest in making changes  
18  
19 prior to randomization so that study participants are appropriate for the intervention.

20  
21 In the present study, the failure to achieve the primary study goal could possibly be explained  
22  
23 by incongruence between the research focus on medical outcomes and participants' possibly  
24  
25 prioritizing aspects of life other than clinical improvements. Consequently, it is important to  
26  
27 assess individual goals in future research using personalized approaches to improving  
28  
29 outcomes. In line with the DAWN2 study, there are still unmet needs of people with diabetes  
30  
31 and those who care for them, and promotion of innovative efforts to improve self-  
32  
33 management and life skills performance should be facilitated [37]. Efforts to manage  
34  
35 emotional distress have been suggested as an integral part of diabetes care [38]. Improving  
36  
37 psychosocial outcomes requires a shift away from a purely medical model to a person-  
38  
39 centered model with greater emphasis on psychosocial aspects. Barnard and colleagues have  
40  
41 advocated a holistic model of diabetes care aiming at enhanced diabetes self-management and  
42  
43 improved outcomes by considering intrinsic thoughts, as well as the environment and therapy  
44  
45 regimen [39].

46  
47 The present study exemplifies a complex behavioral intervention with feasibility challenges  
48  
49 and does not confirm improvements in HbA<sub>1c</sub> and other medical outcomes. However,  
50  
51 autonomous motivation improved and might be one mechanism for reducing diabetes distress.  
52  
53  
54  
55  
56  
57

## Acknowledgements

The authors wish to thank all of the diabetes specialist nurses at the outpatient clinic for their contribution to the data collection and the GSD-trained nurses for participating. We also wish to thank all study participants for their valuable contributions and psychiatrist Jorunn Torgauten, Haukeland University Hospital for her appreciated assistance to secure fidelity to the methodology and appropriate treatment to persons revealing profound psychological issues.

### a. Contributorship statement:

JM, MG, BR, VZ and HT contributed to conception and design of the study. JM collected the data. JM, JA and MP gave substantial contribution to the analysis and interpretation of data. JM wrote the first draft of this manuscript and MG, BR, and MP gave substantial contributions to the interpretation of data and revised the manuscript critically. VZ and HT gave substantial contributions to the intellectual content of the manuscript and revised the manuscript critically. All authors read and contributed to the final draft of the paper.

### b. Competing interests:

Conflict of interests: Author MP declared the following potential conflict of interest: Consulting fees from Astra Zeneca, Calibra, Lilly, and Novo Nordisk; advisory panel of GlaxcoSmithCline, Lilly, and Novo Nordisk; research grants from Novo Nordisk; Speaker for Novo Nordisk. The remaining authors declare that they have no conflict of interest.

### c. Funding:

The study was supported by The Western Norway Regional Health Authority; The Norwegian Diabetes Association; The Norwegian Nurses Organisation and Bergen University College.

1  
2  
3 **d. Data sharing statement:**  
4

5 No additional data available  
6  
7  
8  
9  
10  
11  
12  
13  
14  
15  
16  
17  
18  
19  
20  
21  
22  
23  
24  
25  
26  
27  
28  
29  
30  
31  
32  
33  
34  
35  
36  
37  
38  
39  
40  
41  
42  
43  
44  
45  
46  
47  
48  
49  
50  
51  
52  
53  
54  
55  
56  
57  
58  
59  
60

For peer review only

1. Clark M. Diabetes self-management education: a review of published studies. *Prim Care Diabetes* 2008; **2**:113-120.
2. Haas L, Maryniuk M, Beck J, Cox CE, Duker P, Edwards L, *et al*. National standards for diabetes self-management education and support. *Diabetes care* 2013; **36 Suppl 1**:S100-108.
3. Ryan RM, Deci EL. Self-determination theory and the facilitation of intrinsic motivation, social development, and well-being. *Am Psychol* 2000; **55**:68-78.
4. Peyrot M, Rubin RR, Funnell MM, Siminerio LM. Access to diabetes self-management education: results of national surveys of patients, educators, and physicians. *The Diabetes educator* 2009; **35**:246-248, 252-246, 258-263.
5. Peyrot M, Rubin RR, Lauritzen T, Snoek FJ, Matthews DR, Skovlund SE. Psychosocial problems and barriers to improved diabetes management: results of the Cross-National Diabetes Attitudes, Wishes and Needs (DAWN) Study. *Diabetic medicine : a journal of the British Diabetic Association* 2005; **22**:1379-1385.
6. Zoffmann V, Kirkevold M. Life versus disease in difficult diabetes care: conflicting perspectives disempower patients and professionals in problem solving. *Qualitative health research* 2005; **15**:750-765.
7. Livingstone SJ, Looker HC, Hothersall EJ, Wild SH, Lindsay RS, Chalmers J, *et al*. Risk of cardiovascular disease and total mortality in adults with type 1 diabetes: Scottish registry linkage study. *PLoS medicine* 2012; **9**:e1001321.
8. El Achhab Y, Nejari C, Chikri M, Lyoussi B. Disease-specific health-related quality of life instruments among adults diabetic: A systematic review. *Diabetes research and clinical practice* 2008; **80**:171-184.
9. American Diabetes Association. Standards of medical care in diabetes--2007. *Diabetes Care* 2007; **30 Suppl 1**:S4-S41.
10. Fitzpatrick SL, Schumann KP, Hill-Briggs F. Problem solving interventions for diabetes self-management and control: a systematic review of the literature. *Diabetes Res Clin Pract* 2013; **100**:145-161.
11. Hermanns N, Kulzer B, Ehrmann D, Bergis-Jurgan N, Haak T. The effect of a diabetes education programme (PRIMAS) for people with type 1 diabetes: results of a randomized trial. *Diabetes Res Clin Pract* 2013; **102**:149-157.
12. Group DS. Training in flexible, intensive insulin management to enable dietary freedom in people with type 1 diabetes: dose adjustment for normal eating (DAFNE) randomised controlled trial. *Bmj* 2002; **325**:746.
13. Hopkins D, Lawrence I, Mansell P, Thompson G, Amiel S, Campbell M, *et al*. Improved biomedical and psychological outcomes 1 year after structured education in flexible insulin therapy for people with type 1 diabetes: the U.K. DAFNE experience. *Diabetes Care* 2012; **35**:1638-1642.
14. Muller N, Kloos C, Samann A, Wolf G, Muller UA. Evaluation of a treatment and teaching refresher programme for the optimization of intensified insulin therapy in type 1 diabetes. *Patient Educ Couns* 2013; **93**:108-113.
15. Olesen ML, Duun-Henriksen AK, Hansson H, Ottesen B, Andersen KK, Zoffmann V. A person-centered intervention targeting the psychosocial needs of gynecological cancer survivors: a randomized clinical trial. *Journal of cancer survivorship : research and practice* 2016.
16. Zoffmann V, Lauritzen T. Guided self-determination improves life skills with type 1 diabetes and A1C in randomized controlled trial. *Patient Educ Couns* 2006; **64**:78-86.
17. Zoffmann V, Vistisen D, Due-Christensen M. Flexible guided self-determination intervention for younger adults with poorly controlled Type 1 diabetes, decreased HbA and psychosocial distress in women but not in men: a real-life RCT. *Diabet Med* 2015.
18. Husted GR, Thorsteinsson B, Esbensen BA, Glud C, Winkel P, Hommel E, *et al*. Effect of guided self-determination youth intervention integrated into outpatient visits versus treatment as usual on glycemic control and life skills: a randomized clinical trial in adolescents with type 1 diabetes. *Trials* 2014; **15**:321.

19. Zoffmann V, Prip A, Christiansen AW. Dramatic change in a young woman's perception of her diabetes and remarkable reduction in HbA1c after an individual course of Guided Self-Determination. *BMJ Case Rep* 2015; **2015**.
20. Hoelzel W, Weykamp C, Jeppsson JO, Miedema K, Barr JR, Goodall I, *et al*. IFCC reference system for measurement of hemoglobin A1c in human blood and the national standardization schemes in the United States, Japan, and Sweden: a method-comparison study. *Clinical chemistry* 2004; **50**:166-174.
21. Hermanns N, Kulzer B, Krichbaum M, Kubiak T, Haak T. How to screen for depression and emotional problems in patients with diabetes: comparison of screening characteristics of depression questionnaires, measurement of diabetes-specific emotional problems and standard clinical assessment. *Diabetologia* 2006; **49**:469-477.
22. Polonsky WH, Fisher L, Earles J, Dudl RJ, Lees J, Mullan J, *et al*. Assessing psychosocial distress in diabetes: development of the diabetes distress scale. *Diabetes Care* 2005; **28**:626-631.
23. Williams GC, McGregor HA, King D, Nelson CC, Glasgow RE. Variation in perceived competence, glycemic control, and patient satisfaction: relationship to autonomy support from physicians. *Patient Educ Couns* 2005; **57**:39-45.
24. Alessandri G, Vecchione M, Eisenberg N, Laguna M. On the factor structure of the Rosenberg (1965) General Self-Esteem Scale. *Psychological assessment* 2015; **27**:621-635.
25. Hajos TR, Pouwer F, Skovlund SE, Den Oudsten BL, Geelhoed-Duijvestijn PH, Tack CJ, *et al*. Psychometric and screening properties of the WHO-5 well-being index in adult outpatients with Type 1 or Type 2 diabetes mellitus. *Diabet Med* 2013; **30**:e63-69.
26. Williams GC, McGregor HA, Zeldman A, Freedman ZR, Deci EL. Testing a self-determination theory process model for promoting glycemic control through diabetes self-management. *Health Psychol* 2004; **23**:58-66.
27. Levesque CS, Williams GC, Elliot D, Pickering MA, Bodenhamer B, Finley PJ. Validating the theoretical structure of the Treatment Self-Regulation Questionnaire (TSRQ) across three different health behaviors. *Health Educ Res* 2007; **22**:691-702.
28. Organization WH. Process of translation and adaptation of instruments. 2015.
29. Devries JH, Snoek FJ, Heine RJ. Persistent poor glycaemic control in adult Type 1 diabetes. A closer look at the problem. *Diabet Med* 2004; **21**:1263-1268.
30. Hill-Briggs F, Gemmell L. Problem solving in diabetes self-management and control: a systematic review of the literature. *Diabetes Educ* 2007; **33**:1032-1050; discussion 1051-1032.
31. Bott U, Bott S, Hemmann D, Berger M. Evaluation of a holistic treatment and teaching programme for patients with Type 1 diabetes who failed to achieve their therapeutic goals under intensified insulin therapy. *Diabet Med* 2000; **17**:635-643.
32. Rogvi S, Tapager I, Almdal TP, Schiotz ML, Willaing I. Patient factors and glycaemic control--associations and explanatory power. *Diabet Med* 2012; **29**:e382-389.
33. Shadish WR, Cook TD, Campbell DT. Experimental and quasi-experimental designs for generalized causal inference. New York: Houghton Mifflin Company; 2002.
34. Zagarins SE, Allen NA, Garb JL, Welch G. Improvement in glycemic control following a diabetes education intervention is associated with change in diabetes distress but not change in depressive symptoms. *J Behav Med* 2012; **35**:299-304.
35. Mohn J, Graue M, Assmus J, Zoffmann V, H BT, Peyrot M, *et al*. Self-reported diabetes self-management competence and support from healthcare providers in achieving autonomy are negatively associated with diabetes distress in adults with Type 1 diabetes. *Diabet Med* 2015.
36. van Son J, Nyklicek I, Pop VJ, Blonk MC, Erdtsieck RJ, Spooren PF, *et al*. The effects of a mindfulness-based intervention on emotional distress, quality of life, and HbA(1c) in outpatients with diabetes (DiaMind): a randomized controlled trial. *Diabetes Care* 2013; **36**:823-830.

- 1  
2  
3 37. Nicolucci A, Kovacs Burns K, Holt RI, Comaschi M, Hermanns N, Ishii H, *et al.* Diabetes  
4 Attitudes, Wishes and Needs second study (DAWN2): cross-national benchmarking of diabetes-  
5 related psychosocial outcomes for people with diabetes. *Diabet Med* 2013; **30**:767-777.  
6 38. Gonzales R, Handley MA. Improving glycemic control when "usual" diabetes care is not  
7 enough. *Arch Intern Med* 2011; **171**:1999-2000.  
8 39. Barnard KD, Lloyd CE, Dyson PA, Davies MJ, O'Neil S, Naresh K, *et al.* Kaleidoscope model of  
9 diabetes care: time for a rethink? *Diabet Med* 2014; **31**:522-530.  
10  
11  
12  
13  
14  
15  
16  
17  
18  
19  
20  
21  
22  
23  
24  
25  
26  
27  
28  
29  
30  
31  
32  
33  
34  
35  
36  
37  
38  
39  
40  
41  
42  
43  
44  
45  
46  
47  
48  
49  
50  
51  
52  
53  
54  
55  
56  
57  
58  
59  
60

For peer review only

**CONSORT 2010 checklist of information to include when reporting a randomised trial\***

| Section/Topic       | Item No | Checklist item                                                                                                                                                                              | Reported on page No |
|---------------------|---------|---------------------------------------------------------------------------------------------------------------------------------------------------------------------------------------------|---------------------|
| Title and abstract  | 1a      | Identification as a randomised trial in the title                                                                                                                                           | 1                   |
|                     | 1b      | Structured summary of trial design, methods, results, and conclusions (for specific guidance see CONSORT for abstracts)                                                                     | 2                   |
| Introduction        | 2a      | Scientific background and explanation of rationale                                                                                                                                          | 4-5                 |
|                     | 2b      | Specific objectives or hypotheses                                                                                                                                                           | 5                   |
| Methods             | 3a      | Description of trial design (such as parallel, factorial) including allocation ratio                                                                                                        | 5-6                 |
|                     | 3b      | Important changes to methods after trial commencement (such as eligibility criteria), with reasons                                                                                          | -                   |
|                     | 4a      | Eligibility criteria for participants                                                                                                                                                       | 7                   |
|                     | 4b      | Settings and locations where the data were collected                                                                                                                                        | 6-7                 |
| Interventions       | 5       | The interventions for each group with sufficient details to allow replication, including how and when they were actually administered                                                       | 8-9                 |
|                     | 6a      | Completely defined pre-specified primary and secondary outcome measures, including how and when they were assessed                                                                          | 10-11               |
| Sample size         | 6b      | Any changes to trial outcomes after the trial commenced, with reasons                                                                                                                       | -                   |
|                     | 7a      | How sample size was determined                                                                                                                                                              | 22                  |
| Randomisation:      | 7b      | When applicable, explanation of any interim analyses and stopping guidelines                                                                                                                | 8                   |
|                     | 8a      | Method used to generate the random allocation sequence                                                                                                                                      | 8                   |
| Sequence generation | 8b      | Type of randomisation; details of any restriction (such as blocking and block size)                                                                                                         | 8                   |
|                     | 9       | Mechanism used to implement the random allocation sequence (such as sequentially numbered containers), describing any steps taken to conceal the sequence until interventions were assigned | 8                   |
| Implementation      | 10      | Who generated the random allocation sequence, who enrolled participants, and who assigned participants to interventions                                                                     | 8                   |
|                     | 11a     | If done, who was blinded after assignment to interventions (for example, participants, care providers, those                                                                                | -                   |

assessing outcomes) and how

11b If relevant, description of the similarity of interventions

12a Statistical methods used to compare groups for primary and secondary outcomes

12b Methods for additional analyses, such as subgroup analyses and adjusted analyses

## Results

Participant flow (a diagram is strongly recommended)

13a For each group, the numbers of participants who were randomly assigned, received intended treatment, and were analysed for the primary outcome

13b For each group, losses and exclusions after randomisation, together with reasons

14a Dates defining the periods of recruitment and follow-up

14b Why the trial ended or was stopped

15 A table showing baseline demographic and clinical characteristics for each group

16 For each group, number of participants (denominator) included in each analysis and whether the analysis was by original assigned groups

17a For each primary and secondary outcome, results for each group, and the estimated effect size and its precision (such as 95% confidence interval)

17b For binary outcomes, presentation of both absolute and relative effect sizes is recommended

18 Results of any other analyses performed, including subgroup analyses and adjusted analyses, distinguishing pre-specified from exploratory

19 All important harms or unintended effects in each group (for specific guidance see CONSORT for harms)

**Discussion**

Limitations

20 Trial limitations, addressing sources of potential bias, imprecision, and, if relevant, multiplicity of analyses

21 Generalisability (external validity, applicability) of the trial findings

22 Interpretation consistent with results, balancing benefits and harms, and considering other relevant evidence

**Other information**

23 Registration number and name of trial registry

24 Where the full trial protocol can be accessed, if available

25 Sources of funding and other support (such as supply of drugs), role of funders

\*We strongly recommend reading this statement in conjunction with the CONSORT 2010 Explanation and Elaboration for important clarifications on all the items. If relevant, we also recommend reading CONSORT extensions for cluster randomised trials, non-inferiority and equivalence trials, non-pharmacological treatments, herbal interventions, and pragmatic trials. Additional extensions are forthcoming: for those and for up to date references relevant to this checklist, see [www.consort-statement.org](http://www.consort-statement.org).



# BMJ Open

## The effect of Guided Self-Determination on self-management in persons with Type 1 diabetes mellitus and HbA1c $\geq$ 64 mmol/mol – a group-based randomized controlled trial

|                                 |                                                                                                                                                                                                                                                                                                                                                                                                  |
|---------------------------------|--------------------------------------------------------------------------------------------------------------------------------------------------------------------------------------------------------------------------------------------------------------------------------------------------------------------------------------------------------------------------------------------------|
| Journal:                        | <i>BMJ Open</i>                                                                                                                                                                                                                                                                                                                                                                                  |
| Manuscript ID                   | bmjopen-2016-013295.R1                                                                                                                                                                                                                                                                                                                                                                           |
| Article Type:                   | Research                                                                                                                                                                                                                                                                                                                                                                                         |
| Date Submitted by the Author:   | 26-Jan-2017                                                                                                                                                                                                                                                                                                                                                                                      |
| Complete List of Authors:       | Mohn, Jannike; Hogskolen i Bergen, Centre for Evidence-Based Practice<br>Graue, Marit; Bergen Univ Coll<br>Assmus, Jörg; Haukeland Universitetssjukehus<br>Zoffmann, Vibeke; University Hospital of Copenhagen<br>Thordarson, Hrafnkell; Haukeland Universitetssjukehus<br>Peyrot, Mark; Loyola University Maryland<br>Rokne, Berit; Universitetet i Bergen Det medisinsk-odontologiske fakultet |
| <b>Primary Subject Heading</b>: | Diabetes and endocrinology                                                                                                                                                                                                                                                                                                                                                                       |
| Secondary Subject Heading:      | Patient-centred medicine, Communication                                                                                                                                                                                                                                                                                                                                                          |
| Keywords:                       | General diabetes < DIABETES & ENDOCRINOLOGY, self-management, diabetes distress, educational method, psychological functioning, HbA1c                                                                                                                                                                                                                                                            |
|                                 |                                                                                                                                                                                                                                                                                                                                                                                                  |

SCHOLARONE™  
Manuscripts

1  
2  
3 The effect of Guided Self-Determination on self-management in  
4 persons with Type 1 diabetes mellitus and  $HbA_{1c} \geq 64$  mmol/mol – a  
5 group-based randomized controlled trial  
6  
7

8 Running head:  
9

10 Effect of a behavioral intervention among adults with Type 1 DM and chronically elevated  
11  $HbA_{1c}$   
12  
13

14  
15 Jannike Mohn, RN./Master of Health Science<sup>1\*2 5</sup>

16 M. Graue, RN./PhD<sup>1 6</sup>

17 J. Assmus, PhD<sup>3</sup>

18 V. Zoffmann, RN./PhD<sup>4</sup>

19 H. Thordarson, MD.<sup>5</sup>

20 M. Peyrot, PhD<sup>1 7</sup>

21 B. Rokne, RN./PhD<sup>2 8</sup>

22  
23  
24  
25  
26  
27 <sup>1</sup>Western Norway University of Applied Sciences, Centre for Evidence-Based Practice,  
28 Norway

29  
30 <sup>2</sup>University of Bergen, Department of Global Public Health and Primary Care, Norway

31  
32 <sup>3</sup>Haukeland University Hospital, Centre for Clinical Research, Norway

33  
34 <sup>4</sup>Research Unit Women's and Children's Health, The Juliane Marie Centre, Copenhagen  
35 University Hospital, Rigshospitalet, Copenhagen, Denmark

36  
37 <sup>5</sup>Haukeland University Hospital, Dept. of Medicine, Section of Endocrinology, Norway

38  
39 <sup>6</sup>Haukeland University Hospital, Dept. of Pediatrics, Norway

40  
41 <sup>7</sup>Department of Sociology, Loyola University Maryland, Baltimore, MD, USA

42  
43 <sup>8</sup>Haukeland University Hospital, Dept. for Research and Development, Norway

44  
45 \*Corresponding author:

46 Jannike Mohn

47 E-mail: [jmo@hvl.no](mailto:jmo@hvl.no) or [jmoh@helse-bergen.no](mailto:jmoh@helse-bergen.no)

48 Mailing address: Western Norway University of Applied Sciences, Centre for  
49 Evidence-Based practice,  
50

51 P.O box 7030,

52 N-5063 Bergen, Norway

53  
54  
55  
56  
57  
58  
59  
60  
Phone: + 47 55 58 75 00 or Mobile +47 91 71 91 54

## Abstract

**Objectives:** To examine the impact of Guided Self-Determination (GSD) applied in group training (GSD-GT) in people with chronically elevated HbA<sub>1c</sub> and Type 1 diabetes mellitus (DM) hypothesising GSD-GT was superior to 'care as usual' in improving HbA<sub>1c</sub> and psychological functioning.

**Setting:** An out-patient clinic at a university hospital in Western Norway.

**Participants:** 178 adults (all Caucasian) aged 18-55 (mean age 36.7 ±10.7, 62% women) with Type 1 DM for at least one year and HbA<sub>1c</sub> ≥ 64 mmol/mol (8.0%) were randomly assigned to participate in either GSD-GT or a control group. Exclusion criteria were severe co-morbidity, major psychiatric disorder, cognitive deficiency/language barriers and pregnancy.

**Intervention:** Intervention group met 7 times for 2 hours over 14 weeks to promote patient autonomy and intrinsic motivation using reflection sheets and advanced professional communication in accordance with the GSD methodology.

**Primary and secondary outcome measures:** The primary outcome was 9-month post-intervention HbA<sub>1c</sub>; secondary outcomes were self-monitored blood glucose (SMBG) frequency, self-reported diabetes competence (PCDS), autonomy support by health-care providers (HCCQ), autonomous versus controlled diabetes motivation (TSRQ), diabetes distress (PAID and DDS), self-esteem (RSES) and psychological well-being (WHO-5 scale).

**Results:** Among participants allocated to the GSD-GT (*n* = 90) 48 completed the study, whereas 83 completed in the CG (*n* = 88). With 95% confidence intervals (CI) GSD-GT did not have effect on HbA<sub>1c</sub> (B -0.18, CI (-0.48, 0.12), *p*=0.234). GSD-GT improved autonomy-motivated behaviour (B 0.51, CI (0.25, 0.77), *p*<0.001), diabetes distress (PAID, B -6.96, CI (-11.40, -2.52), *p*=0.002; total DDS, B -5.15, CI (-9.34, -0.96), *p*=0.016; DDS Emotional

1  
2  
3 burden, B -7.19, CI (-13.20, -1.19)  $p=0.019$ ) and self-esteem (B 1.43, CI (0.34, 2.52),  
4  
5  $p=0.011$ ).

6  
7 Conclusions: Results from this behavioral intervention must be interpreted cautiously because  
8  
9 of recruitment and attrition problems. Medical outcomes did not improve. Psychological  
10  
11 outcomes improved, especially reduced diabetes distress.

12  
13  
14 Trial registration: Clinical Trials.gov with identification number NCT 01317459.  
15  
16  
17  
18  
19  
20  
21  
22  
23  
24  
25  
26  
27  
28  
29  
30  
31  
32  
33  
34  
35  
36  
37  
38  
39  
40  
41  
42  
43  
44  
45  
46  
47  
48  
49  
50  
51  
52  
53  
54  
55  
56  
57  
58  
59  
60

1  
2  
3 **Article summary:**  
4

5  
6 Strengths and limitations of this study  
7

- 8 • This study evaluated the effect of a person-centered behavioral intervention among adults  
9 with Type 1 DM, scarcely evaluated in the literature compared to educational programmes  
10 among persons with Type 2 DM  
11  
12  
13  
14 • Targeting persons with Type 1 DM and chronically elevated HbA<sub>1c</sub> is a challenge because  
15 long-standing poor glycaemic control appears to be a complex and heterogenous  
16 phenomenon  
17  
18  
19  
20  
21 • The most obvious limitation of this study is that generalizability might be distorted due to  
22 recruitment problems, and attrition from the GSD-GT program  
23  
24  
25  
26  
27  
28  
29  
30  
31  
32  
33  
34  
35  
36  
37  
38  
39  
40  
41  
42  
43  
44  
45  
46  
47  
48  
49  
50  
51  
52  
53  
54  
55  
56  
57  
58  
59  
60

## Introduction

Diabetes is considered a demanding condition requiring complex self-management tasks for the individual. Effective self-management is a prerequisite for preventing long-term complications and the immediate risk of hypoglycaemia. Researchers underscore that diabetes self-management education is an ongoing process rather than a one-time event [1]. American Diabetes Association (ADA) National Standards for Diabetes Self-management Education and Support hold that self-management does not stop when a person with diabetes leaves the educator's office [2]. Consequently, motivation is a key concept, and one based on respect for the individual's autonomy is essential as it is connected with success in reaching and maintaining goals [3]. Therefore, the challenge for health-care professionals (HCPs) is to implement an autonomy supportive approach instead of one based on control or disclaimed responsibility [4]. Considerable barriers to such an approach exist [5] and personal problems in living with the illness might remain unclarified and unresolved [6]. This can contribute to the 37-56% of people with Type 1 DM who are living with blood sugar above target levels [7] and at increased risk of late complications together with poor quality of life [8]. The ADA states that diabetes care is often suboptimal. Lacking are collaborative, multidisciplinary teams well suited to provide appropriate self-management education among persons with diabetes [9].

One of the first structured diabetes treatment and education programmes for Type 1 DM was developed between 1980 and 1990 [10]. While many trials have evaluated the effect of diabetes education programs in Type 2 DM, there is still a paucity of trials evaluating evidence-based self-management programmes promoting empowerment in adults with Type 1 DM [11]. Among persons with Type 1 DM the DAFNE (Dose Adjustment for Normal Eating) education programme showed significant improvements in HbA<sub>1c</sub> in the early stage of the trial [12] but more modest longer-term improvements [13]. A self-management-oriented

1  
2  
3 education programme (PRIMAS) showed effect on glycaemic control and reduced diabetes  
4  
5 distress at six months follow-up compared with an established education programme in a  
6  
7 multi-centre trial [14]. In an uncontrolled evaluation of the DTTP (Diabetes Teaching and  
8  
9 Treatment Programme) persons with moderately controlled Type 1 DM improved their HbA<sub>1c</sub>  
10  
11 and treatment satisfaction [15].  
12

13  
14 Guided Self-Determination (GSD) is a theory- and evidence-based problem-solving method  
15  
16 to overcome barriers to collaborative care. It is based on life skills theory, dynamic  
17  
18 judgement-building and theories about behaviour change. GSD promotes patient autonomy,  
19  
20 participation, skills building and intrinsic motivation [16] The method is applicable in group  
21  
22 training or individual care for a variety of conditions. In a recent study GSD improved  
23  
24 physical well-being in women surgically treated for gynaecological cancer [17]. For persons  
25  
26 with Type 1 DM the GSD methodology has demonstrated some success. The first randomized  
27  
28 controlled trial among adults showed significant improvement in glycaemic control and life-  
29  
30 skills [18]. In later studies GSD proved to be either borderline effective or not effective  
31  
32 concerning glycaemic control among younger adults/adolescents; however, it reduced  
33  
34 diabetes distress and lack of motivation and improved diabetes competence among young  
35  
36 adult women [19, 20]. In addition, a case report on a young woman showed considerable  
37  
38 reduction in HbA<sub>1c</sub> after a GSD intervention [21]. Thus, GSD seems worthy of further  
39  
40 research. This randomized intervention study seeks to test whether GSD is superior to ‘care as  
41  
42 usual’ (CU) in improving glycaemic control and psychological functioning.  
43  
44  
45  
46

## 47 **PATIENTS AND METHODS**

### 48 **Design**

49  
50  
51  
52  
53 This study was a prospective, randomized trial with two treatment groups. Participants were  
54  
55 recruited from an out-patient setting at a university hospital in Western Norway. The  
56  
57  
58  
59  
60

1  
2  
3 hospital's population is ethnically homogeneous, and includes both urban and rural  
4  
5 populations. To test the effect of GSD persons with Type 1 DM and suboptimal metabolic  
6  
7 control were invited to participate in an educational group treatment intervention (GSD  
8  
9 Group-Training, GSD-GT) or care as usual control group, (CG). The Regional Committee for  
10  
11 Medical and Health Research Ethics approved the study (approval number 2010/1325), and  
12  
13 gave access to the age, gender and HbA<sub>1c</sub> of non-responders. Participants gave written  
14  
15 informed consent.  
16

### 17 18 **Recruitment**

19  
20  
21 From March 2011 to March 2013 all persons with Type 1 DM attending consultations at the  
22  
23 university hospital (n=561) were assessed for eligibility according to the inclusion criteria  
24  
25 (Fig. 1). Further details on inclusion and exclusion criteria are outlined elsewhere [22]. A pre-  
26  
27 study power calculation for a t-test assuming a 0.05 significance level and a power of 0.8  
28  
29 expecting 25% drop-out and a difference of 0.6% change in HbA<sub>1c</sub> (SD 1.3) between groups  
30  
31 led to 218 participants needed to include. Expected change in HbA<sub>1c</sub> was based on clinical  
32  
33 relevance.  
34  
35

36  
37 After identifying 476 people who met study criteria a request was sent by post 1-3 weeks in  
38  
39 advance of their next clinical consultation, inviting them to take part in the study. To those  
40  
41 who neither responded to the request nor attended at the clinic appointment an additional  
42  
43 letter was sent. If still no response nor attendance at the clinic, they were classified as non-  
44  
45 responders (n = 149). Another 149 persons actively declined participation. Their response was  
46  
47 given when they were at the clinic, or by telephone if they were unable to meet for their  
48  
49 scheduled appointment. Those willing to participate were consented when they were at the  
50  
51 clinic (n = 178). The participation rate in the study was 37.4% (178 of the 476 who met  
52  
53  
54  
55  
56  
57  
58  
59  
60



1  
2  
3 inclusion criteria). Participants received no monetary incentives. All sessions were free of  
4  
5 charge.

### 6 7 8 **Randomization**

9  
10 The randomization occurred externally and was stratified in computer-generated sequences  
11  
12 unknown to the investigators. Blinding was considered impossible due to the nature of the  
13  
14 intervention and was not attempted. Participants were randomized to either the usual care CG  
15  
16 ( $n = 88$ ; M/W:  $n = 40/48$ ) or GSD-GT ( $n = 90$ ; M/W:  $n = 26/64$ ). The groups consisted of a  
17  
18 minimum of two and a maximum of seven participants. Each GSD training group was  
19  
20 balanced according to sex and age, preferably an equal number of men and women in each  
21  
22 group and age ranging  $\pm 6$  years.

23  
24  
25  
26 In the CG and GSD-GT conditions five and forty-two participants were lost to follow-up,  
27  
28 respectively; thus 131 participants (74%) completed the trial. The reasons for drop-out in both  
29  
30 study groups, and the total flow of participants through each stage of the trial is depicted in  
31  
32 Fig. 1.

### 33 34 35 36 **Intervention**

37  
38 The GSD intervention was based on a technique by which the HCPs encourage people with  
39  
40 diabetes to reflect on different problem areas concerning their daily lives with diabetes and  
41  
42 develop autonomous motivation for life style changes. The technique was partly built on  
43  
44 semi-structured work sheets filled in before and between each appointment, making the  
45  
46 people with diabetes prepared with enhanced self-insight and ability to talk about personal  
47  
48 difficulties. The perceived obstacles and barriers were responded to by HCPs with specific  
49  
50 communication skills who conducted each consultation consistent with the GSD methodology  
51  
52 [18]. Intervention-group participants met 7 times for 2 hour sessions over 14 weeks. Two  
53  
54 GSD-trained diabetes specialist nurses supervised each session. Nurses were given 1 hour per  
55  
56  
57  
58  
59  
60

1  
2  
3 week group-based feedback to secure fidelity to the protocol. No GSD-GT participants  
4  
5 received additional treatment during the intervention period, except two participants who  
6  
7 needed one extra consultation because of technical problems with their insulin pumps.  
8  
9

10 The control group received traditional out-patient consultations, 'care as usual', consisting of  
11  
12 individual counseling by nurses, physicians or dieticians, with measurements of HbA<sub>1c</sub> and  
13  
14 advice on how to improve glycaemic control. No control-group participants met with GSD-  
15  
16 trained nurses during the intervention period.  
17  
18

### 19 **Assessments**

20  
21  
22 Participant characteristics were assessed at baseline. Primary and secondary outcome  
23  
24 measurements were performed at baseline and 9 months after the last session of group  
25  
26 intervention (GSD-GT) or 9 months after inclusion (CG). Due to individual differences in  
27  
28 days/weeks from point of randomization to start of intervention group, a clear post  
29  
30 intervention standardization on the time of the follow-up assessment was difficult to obtain  
31  
32 between the groups.  
33  
34  
35

### 36 **Primary outcome measure**

37  
38  
39 The primary endpoint was glycaemic control (HbA<sub>1c</sub>) which was assessed in connection with  
40  
41 a regularly scheduled visit at the hospital. The blood samples were analysed using high-  
42  
43 performance liquid chromatography (DCA Vantage/Siemens, DCA 2000 and DCA  
44  
45 2000+/Bayer), assays standardized and calibrated against the IFCC – (International  
46  
47 Federation of Clinical Chemists) standards [23].  
48  
49  
50

### 51 **Secondary outcome measures**

52  
53  
54 All participants reported the number of self-monitored blood glucose measurements (SMBGs)  
55  
56 completed in the past two weeks in the following categories: seven or more measurements per  
57  
58  
59

1  
2  
3 day, one to six measurements per day, and less than daily measurements. Participants also  
4  
5 completed seven self-report instruments assessing aspects of psychological functioning  
6  
7 consistent with the theoretical framework of GSD.  
8  
9

10 The *Problem Areas In Diabetes scale* (PAID) measures negative emotions related to living  
11  
12 with diabetes (range = 0-100 scale); higher scores represent greater distress [24].  
13  
14

15 The *Diabetes Distress scale* (DDS) measures the level of diabetes distress with an overall  
16  
17 score and 4 subscales: emotional burden, regimen-related, interpersonal-related and medical  
18  
19 care-related distress (range = 1-6); higher scores represent greater distress [25].  
20  
21

22 The *Perceived Competence for Diabetes Scale* (PCDS) assesses the degree to which persons  
23  
24 with diabetes feel they can manage the every-day aspects of diabetes care (range = 1-7);  
25  
26 higher scores represent greater perceived competence [26].  
27  
28

29 The *Rosenberg Self-Esteem Scale* (RSES) measures one's overall self-esteem (range = 1-4);  
30  
31 higher scores represent better self-esteem [27].  
32  
33

34 The *World Health Organization five-item (WHO-5) Well-Being Index* measures emotional  
35  
36 well-being (range = 0-100); higher scores represent better emotional well-being [28].  
37  
38

39 The *Health Care Climate Questionnaire* (HCCQ) assesses patients' perceptions of the degree  
40  
41 to which health-care providers are supportive of autonomy rather than controlling (range = 1-  
42  
43 7); higher scores represent greater perceived support for autonomy [29].  
44  
45  
46

47 The *Treatment Self-regulation Questionnaire* (TSRQ) assesses the diabetes self-care practices  
48  
49 and whether this behavior is self-motivated (autonomous/internal) or controlled (external)  
50  
51 [30]. A relative autonomy index (TSRQ Relative Autonomy Index) was also calculated.  
52  
53  
54  
55  
56  
57  
58  
59  
60

1  
2  
3 The PCDS, the HCCQ and the TSRQ were translated into Norwegian and back-translated into  
4  
5 English by professional translators, in accordance with the WHO guidelines [31].  
6  
7

### 8 **Statistical analysis**

9

10 Mann-Whitney U tests and  $\chi^2$  tests were used to assess randomization efficacy by testing for  
11  
12 differences in baseline measures. To assess differential attrition members of GSD-GT who  
13  
14 completed the study were compared to those who did not.  
15

16  
17 We fitted a regression model for each outcome at 9 months to investigate the difference  
18  
19 between intervention and control groups both unadjusted and adjusted for baseline outcome.  
20  
21 To take into account possible bias introduced by the high attrition rate in the intervention  
22  
23 group we additionally adjusted for variables showing unbalanced attrition. We used a linear  
24  
25 regression model for all outcomes except SMBG where a multinomial logistic model was  
26  
27 used. We used a linear regression model to test whether change in SMBG mediated change in  
28  
29 HbA<sub>1c</sub> and whether psychological effects were mediated by increased autonomy.  
30  
31

32  
33 There were no intermediate assessments of most outcomes; only HbA<sub>1c</sub> was assessed for  
34  
35 those who did not complete the study. Therefore, per-protocol and intention-to-treat analyses  
36  
37 were identical for all outcomes except HbA<sub>1c</sub>, where intention-to-treat analysis was selected as  
38  
39 the more conservative choice.  
40

41  
42 For data analyses, the statistical software program SPSS Statistics (version 22, Chicago, IL,  
43  
44 USA 26 (SPSS Inc.) was used. Significance level was set to 0.05. Missing values were  
45  
46 handled by pairwise exclusion.  
47  
48  
49  
50  
51  
52  
53  
54  
55  
56  
57  
58  
59  
60

## RESULTS

### Baseline characteristics

The mean age of all subjects in the study sample was 36.7 years ( $\pm 10.7$ ), the median disease duration was 19 years (range = 1-46), 13.5% were unemployed, 96.6% were white and 31.5% had diabetes-related complications. A comparison of the baseline characteristics between the groups (without taking the attrition rate into account) suggests that the randomization was successful for all parameters except sex, in that we found a significant difference in the number of women assigned to the study groups (M/W in the GSD-GT:  $n = 26/64$  (29/71%) versus M/W in the CG:  $n = 37/46$  (45/55%),  $p = 0.022$ ) (results not shown). Baseline characteristics of the sample are presented in Table 1.

**Table 1** Baseline characteristics of Control group versus GSD Intervention group (N=173)

|                                                  | A. Control group<br>(Completers)<br><br>n=83 | B. GSD Intervention group |                                 | A vs B1<br><br><i>P</i> | B1 vs B2<br><br><i>P</i> |
|--------------------------------------------------|----------------------------------------------|---------------------------|---------------------------------|-------------------------|--------------------------|
|                                                  |                                              | B1<br>Follow-up<br>n=48   | B2<br>Lost to Follow-up<br>n=42 |                         |                          |
| <b>Participants characteristics</b>              |                                              |                           |                                 |                         |                          |
| Sex, women <sup>1 2</sup>                        | 46 (55.4)                                    | 35 (72.9)                 | 29 (69.0)                       | .047                    | .686                     |
| Age, years <sup>3 4</sup>                        | 37.2 (10.9)                                  | 36.9 (9.4)                | 36.3 (11.6)                     | .860                    | .916                     |
| Living alone, yes <sup>1 2</sup>                 | 17 (20.5)                                    | 5 (10.4)                  | 6 (14.3)                        | .138                    | .576                     |
| Education University, yes <sup>1 2</sup>         | 30 (36.1)                                    | 23 (47.9)                 | 10 (23.8)                       | .186                    | .018                     |
| Employed <sup>1 2</sup>                          |                                              |                           |                                 |                         |                          |
| - Fulltime                                       | 54 (65.1)                                    | 34 (70.8)                 | 28 (66.7)                       | .485                    | .464                     |
| - Part-time                                      | 16 (19.3)                                    | 10 (20.8)                 | 7 (16.7)                        |                         |                          |
| - Not working                                    | 13 (15.7)                                    | 4 (8.3)                   | 7 (16.7)                        |                         |                          |
| Diabetes duration, years <sup>3 4</sup>          | 20.6 (11.2)                                  | 18.5 (10.6)               | 18.0 (11.0)                     | .310                    | .694                     |
| Long-term complications, yes <sup>1 2</sup>      | 29 (34.9)                                    | 11 (22.9)                 | 15 (35.7)                       | .150                    | .181                     |
| Treatm.regimen, Insulin Pump, yes <sup>1 2</sup> | 37 (44.6)                                    | 16 (33.3)                 | 20 (47.6)                       | .206                    | .168                     |
| Severe hypoglycemia, yes <sup>1 2</sup>          | 35 (42.7)                                    | 24 (50.0)                 | 13 (31.7)                       | .419                    | .081                     |
| BMI <sup>3 4</sup>                               | 26.0 (4.1)                                   | 25.0 (3.6)                | 25.8 (4.0)                      | .145                    | .333                     |
| <b>Outcomes</b>                                  |                                              |                           |                                 |                         |                          |
| HbA <sub>1c</sub> , mmol/mol <sup>3 4</sup>      | 78 (12.7)                                    | 76 (10.4)                 | 81 (11.7)                       |                         |                          |
| HbA <sub>1c</sub> , % <sup>3 4</sup>             | 9.3 (1.2)                                    | 9.1 (1.0)                 | 9.5 (1.1)                       | .320                    | .018                     |
| SMBG <sup>5 1 2</sup>                            |                                              |                           |                                 |                         |                          |

|   |                                           |             |             |             |      |      |
|---|-------------------------------------------|-------------|-------------|-------------|------|------|
| - | >=7 times per day                         | 8 (9.6)     | 8 (16.7)    | 5 (11.9)    | .439 | .627 |
| - | 1-6 times per day                         | 51 (61.4)   | 29 (60.4)   | 24 (57.1)   |      |      |
| - | < every day                               | 24 (28.9)   | 11 (22.9)   | 13 (31.0)   |      |      |
|   | PAID <sup>6 3 4</sup>                     | 35.3 (18.7) | 36.8 (19.3) | 41.6 (24.4) | .696 | .355 |
|   | DDS <sup>7 3 4</sup> (sumscore)           | 31.9 (16.7) | 33.1 (16.4) | 37.3 (20.9) | .643 | .340 |
|   | DDS Emotional burden <sup>3 4</sup>       | 36.0 (22.5) | 36.9 (25.6) | 42.3 (26.0) | .985 | .297 |
|   | DDS Physician distress <sup>3 4</sup>     | 17.7 (19.9) | 18.1 (18.2) | 19.7 (23.1) | .826 | .990 |
|   | DDS Regimen distress <sup>3 4</sup>       | 45.8 (23.7) | 44.7 (21.8) | 53.9 (25.4) | .816 | .036 |
|   | DDS Interpersonal distress <sup>3 4</sup> | 21.0 (20.1) | 26.1 (19.3) | 24.9 (23.2) | .101 | .577 |
|   | PCDS <sup>8 3 4</sup>                     | 4.5 (1.6)   | 4.4 (1.4)   | 3.9 (1.6)   | .734 | .088 |
|   | RSES <sup>9 3 4</sup>                     | 19.6 (5.5)  | 19.5 (5.4)  | 19.0 (6.2)  | .876 | .624 |
|   | WHO5 <sup>10 3 4</sup>                    | 57.6 (18.6) | 60.9 (19.8) | 57.1 (20.5) | .338 | .468 |
|   | HCCQ <sup>11 3 4</sup>                    | 5.1 (1.4)   | 4.9 (1.6)   | 4.8 (1.6)   | .595 | .923 |
|   | TSRQ Autonomy <sup>12 3 4</sup>           | 5.2 (1.1)   | 5.4 (1.0)   | 4.9 (1.3)   | .754 | .088 |
|   | TSRQ Control <sup>13 3 4</sup>            | 3.2 (1.3)   | 3.5 (1.2)   | 3.1 (1.2)   | .073 | .061 |
|   | TSRQ RAI <sup>14 3 4</sup>                | 2.0 (1.3)   | 1.8 (1.5)   | 1.8 (1.7)   | .339 | .588 |

<sup>1</sup>N (%), <sup>2</sup>Chi-square ( $\chi^2$ ), <sup>3</sup>Mean (SD), <sup>4</sup>Mann-Whitney,

<sup>5</sup>Self-Monitoring Blood Glucose, <sup>6</sup>Problem Areas in Diabetes scale, <sup>7</sup>Diabetes Distress Scale, <sup>8</sup>Perceived Competence in Diabetes Scale, <sup>9</sup>Rosenberg Self-Esteem Scale, <sup>10</sup>WHO(5)Well-being Index, <sup>11</sup>Health Care Climate Questionnaire, <sup>12</sup>Treatment Self-Regulation Questionnaire, Autonomous motivation, <sup>13</sup>Treatment Self-Regulation Questionnaire, Controlled motivation, <sup>14</sup>Treatment Self-Regulation Questionnaire, Relative Autonomy Index

1  
2  
3 Due to the considerable number of drop-outs in GSD-GT, participants were stratified into  
4 Follow-up and Lost to Follow-up. There was a statistically significant difference at baseline  
5 between CG and GSD-GT Follow-up regarding sex ( $p = 0.047$ ). The remaining baseline  
6 characteristics did not differ significantly between these groups. The analysis of attrition  
7 showed that GSD-GT Lost to Follow-up participants had poorer baseline glycaemic control  
8 than GSD-GT Follow-up participants. Similarly, there were significantly fewer persons with  
9 education at a university level in the GSD-GT Lost to Follow-up and they scored higher on  
10 diabetes distress (DDS, Subscale 3, Regimen distress) than persons in the GSD-GT Follow-up  
11 group. There were no statistically significant differences regarding the remaining baseline  
12 characteristics between these groups.  
13  
14  
15  
16  
17  
18  
19  
20  
21  
22  
23

24  
25 Among participants allocated to the CG there were no statistically significant baseline  
26 differences between those who fulfilled the trial ( $n = 83$ ) and those who were lost to follow-up  
27 ( $n = 5$ , data not shown).  
28  
29  
30

### 31 32 **Primary outcome** 33

34  
35 As seen in Table 2, HbA<sub>1c</sub> declined significantly within both groups ( $p < 0.001$ ) from baseline  
36 to the 9 month follow-up, with no significant difference between the groups.  
37  
38  
39  
40  
41  
42  
43  
44  
45  
46  
47  
48  
49  
50  
51  
52  
53  
54  
55  
56  
57  
58  
59  
60



**Table 2** Outcomes in control group and Guided-Self-Determination (GSD) intervention group (N=131)

|                                  | Within group change <sup>1</sup> |                      |         |                        |                      |         | Between groups change <sup>2,3</sup> |                         |         |                             |                         |         |
|----------------------------------|----------------------------------|----------------------|---------|------------------------|----------------------|---------|--------------------------------------|-------------------------|---------|-----------------------------|-------------------------|---------|
|                                  | Control group<br>Mean (SD)       |                      |         | GSD group<br>Mean (SD) |                      |         | Model 1                              |                         |         | Model 2                     |                         |         |
|                                  | Baseline<br>(n = 83)             | 9 months<br>(n = 83) | p-value | Baseline<br>(n = 48)   | 9 months<br>(n = 48) | p-value | Effect<br>size <sup>4</sup>          | B <sup>5</sup> (95% CI) | p-value | Effect<br>size <sup>4</sup> | B <sup>5</sup> (95% CI) | p-value |
| <b>Primary Outcome</b>           |                                  |                      |         |                        |                      |         |                                      |                         |         |                             |                         |         |
| HbA <sub>1c</sub> % <sup>6</sup> | 9.3 (1.2)                        | 8.9 (1.3)            | <0.001  | 9.1 (1.0)              | 8.5 (1.1)            | <0.001  | 0.005                                | -0.15 (-0.45, 0.15)     | .316    | 0.007                       | -0.18 (-0.48, 0.12)     | .234    |
| HbA <sub>1c</sub> mmol/mol       | 78 (12.7)                        | 74 (14.1)            |         | 76 (10.4)              | 70 (11.7)            |         |                                      |                         |         |                             |                         |         |
| <b>Secondary outcomes</b>        |                                  |                      |         |                        |                      |         |                                      |                         |         |                             |                         |         |
| <b>Medical</b>                   |                                  |                      |         |                        |                      |         |                                      |                         |         |                             |                         |         |
| PCDS <sup>7</sup>                | 4.5 (1.6)                        | 4.7 (1.5)            | .305    | 4.4 (1.4)              | 4.7 (1.6)            | .071    | 0.003                                | 0.25 (-0.18, 0.67)      | .247    | 0.003                       | 0.26 (-0.17, 0.70)      | .229    |
| HCCQ <sup>8</sup>                | 5.1 (1.4)                        | 5.0 (1.4)            | .618    | 4.9 (1.6)              | 5.0 (1.6)            | .802    | 0.000                                | 0.04 (-0.46, 0.54)      | .873    | 0.000                       | 0.03 (-0.48, 0.54)      | .904    |
| <b>Type of motivation</b>        |                                  |                      |         |                        |                      |         |                                      |                         |         |                             |                         |         |
| TSRQ <sup>9</sup> Autonomy       | 5.2 (1.1)                        | 5.1 (1.1)            | .085    | 5.4 (1.0)              | 5.6 (0.9)            | .060    | 0.067                                | 0.53 (0.28, 0.79)       | < .001  | 0.061                       | 0.51 (0.25, 0.77)       | < .001  |
| TSRQ Control                     | 3.2 (1.3)                        | 3.1 (1.3)            | .532    | 3.5 (1.2)              | 3.3 (1.1)            | .072    | 0.000                                | 0.13 (-0.13, 0.40)      | .321    | 0.000                       | 0.16 (-0.11, 0.43)      | .237    |

1  
2  
3  
4  
5  
6  
7  
8  
9  
10  
11  
12  
13  
14  
15  
16  
17  
18  
19  
20  
21  
22  
23  
24  
25  
26  
27  
28  
29  
30  
31  
32  
33  
34  
35  
36  
37  
38  
39  
40  
41  
42  
43  
44  
45  
46  
47

|                            |             |             |      |             |             |      |       |                       |      |       |                       |      |
|----------------------------|-------------|-------------|------|-------------|-------------|------|-------|-----------------------|------|-------|-----------------------|------|
| TSRQ Index                 | 2.0 (1.3)   | 1.9 (1.2)   | .364 | 1.8 (1.5)   | 2.3 (1.3)   | .014 | 0.047 | 0.40 (0.06, 0.73)     | .020 | 0.038 | 0.35 (0.01, 0.69)     | .045 |
| <b>Psychological</b>       |             |             |      |             |             |      |       |                       |      |       |                       |      |
| PAID <sup>10</sup>         | 35.3 (18.7) | 34.2 (19.6) | .488 | 36.8 (19.3) | 29.8 (18.9) | .002 | 0.038 | -6.66 (-11.03, -2.29) | .003 | 0.043 | -6.96 (-11.40, -2.52) | .002 |
| DDS <sup>11</sup> overall  | 31.9 (16.7) | 30.4 (17.5) | .323 | 33.1 (16.4) | 27.9 (16.8) | .012 | 0.022 | -4.45 (-8.62, -0.27)  | .037 | 0.033 | -5.15 (-9.34, -0.96)  | .016 |
| DDS Emotional burden       | 36.0 (22.5) | 35.7 (24.4) | .995 | 36.9 (25.6) | 35.7 (24.4) | .019 | 0.035 | -6.92 (-12.82, -1.01) | .022 | 0.042 | -7.19 (-13.20, -1.19) | .019 |
| DDS Physician distress     | 17.7 (19.9) | 17.8 (19.0) | .864 | 18.1 (18.2) | 19.3 (19.7) | .337 | 0.001 | 1.14 (-4.38, 6.66)    | .684 | 0.000 | -0.41 (-5.80, 4.98)   | .880 |
| DDS Regimen distress       | 45.8 (23.7) | 40.2 (22.1) | .005 | 44.7 (21.8) | 36.8 (22.8) | .001 | 0.015 | -4.96 (-10.55, 0.64)  | .082 | 0.018 | -5.38 (-11.07, 0.32)  | .064 |
| DDS Interpersonal distress | 21.0 (20.1) | 22.2 (21.6) | .455 | 26.1 (19.3) | 22.8 (22.3) | .383 | 0.005 | -2.20 (-8.26, 3.87)   | .475 | 0.005 | -2.24 (-8.40, 3.91)   | .472 |
| RSES <sup>12</sup>         | 19.6 (5.5)  | 18.9 (5.5)  | .027 | 19.5 (5.4)  | 20.2 (4.8)  | .267 | 0.041 | 1.30 (0.22, 2.38)     | .018 | 0.048 | 1.43 (0.34, 2.52)     | .011 |
| WHO5 <sup>13</sup>         | 57.6 (18.6) | 56.3 (21.4) | .129 | 60.9 (19.8) | 60.6 (17.4) | .960 | 0.010 | 3.58 (-2.24, 9.40)    | .226 | 0.019 | 4.97 (-0.80, 10.75)   | .091 |

<sup>1</sup>All within group change values referred as t-tests

<sup>2</sup> Model 1: Adjusted for baseline value of outcome, Model 2: Adjusted for baseline value of outcome and sex

<sup>3</sup>Regression coefficient from linear regression

<sup>4</sup>Partial  $\eta^2$

<sup>5</sup> B = unstandardized coefficients

<sup>6</sup> Within group- or between group change equal for HbA<sub>1c</sub> in per cent or mmol/mol

<sup>7</sup>Perceived Competence in Diabetes Scale, <sup>8</sup>Health Care Climate Questionnaire, <sup>9</sup>Treatment Self-Regulation Questionnaire, <sup>10</sup>Problem Areas in Diabetes scale, <sup>11</sup>Diabetes Distress Scale, <sup>12</sup>Rosenberg Self-Esteem Scale, <sup>13</sup>WHO (5) Well-being Index

## Secondary outcomes

The results for all secondary outcome measures are presented in Table 2, except SMBG (Table 3). Secondary outcomes are clustered into a) medical measures, b) type of motivation and c) psychological measures.

### a) Medical measures:

The proportion of SMBG seven times per day or more increased significantly within both groups from baseline to the 9 month follow-up. There was no significant difference between groups in change at the 9-month follow-up. The change of HbA<sub>1c</sub> was not mediated by the change of SMBG ( $p=0.728$ , data not shown). Self-perceived diabetes competence (PCDS) and autonomy support from health care professionals (HCCQ) showed no significant change, neither within nor between groups.

### b) Type of motivation:

The TSRQ Relative Autonomy Index showed a significant improvement within the GSD-GT group ( $p = 0.014$ ), and a significant difference between groups in change ( $B = 0.35$ ,  $p = 0.045$ ). This finding was due primarily to a significant improvement in TSRQ Autonomy for GSD-GT relative to CG ( $B = 0.51$ ,  $p < 0.001$ ). TSRQ Control remained unchanged within both groups, with no significant difference between groups.

### c) Psychological measures:

Participants in the GSD-GT group exhibited a significant reduction in diabetes-related distress relative to the CG as measured by the PAID, the DDS overall score and the DDS Emotional burden subscale ( $B = -6.96$ ,  $p = 0.002$ ;  $B = -5.15$ ,  $p = 0.016$  and  $B = -7.19$ ,  $p = 0.019$ , respectively). In addition, a reduction in DDS Regimen distress was reported within the GSD-GT group as well as the CG; the difference in group improvement did not reach significance. The GSD-GT group showed an increase in self-esteem (RSES) relative to the CG ( $B = 1.43$ ,  $p$

1  
2  
3 = 0.011); the CG experienced a decrease in self-esteem ( $p = 0.027$ ). The level of overall well-  
4 being (WHO-5) showed no significant change, neither within nor between the study groups.  
5  
6  
7 Neither PAID, DDS Total nor RSES were significantly mediated by TSRQ Autonomy  
8  
9 ( $p > 0.070$ , data not shown).  
10  
11  
12  
13  
14  
15  
16  
17  
18  
19  
20  
21  
22  
23  
24  
25  
26  
27  
28  
29  
30  
31  
32  
33  
34  
35  
36  
37  
38  
39  
40  
41  
42  
43  
44  
45  
46  
47  
48  
49  
50  
51  
52  
53  
54  
55  
56  
57  
58  
59  
60

**Table 3** Outcomes for Self-Monitoring Blood Glucose (SMBG) in control group and Guided Self-Determination (GSD) intervention group (N=131)

|                   | Within group change <sup>1</sup> |                      |         |                      |                      |         | Between groups change <sup>2,3</sup> |         |                    |         |
|-------------------|----------------------------------|----------------------|---------|----------------------|----------------------|---------|--------------------------------------|---------|--------------------|---------|
|                   | Control group<br>n (%)           |                      |         | GSD group<br>n (%)   |                      |         | Model 1                              |         | Model 2            |         |
|                   | Baseline<br>(n = 83)             | 9 months<br>(n = 82) | p-value | Baseline<br>(n = 48) | 9 months<br>(n = 47) | p-value | OR (95% CI)                          | p-value | OR (95% CI)        | p-value |
| <b>SMBG</b>       |                                  |                      |         |                      |                      |         |                                      |         |                    |         |
| >=7 times per day | 8 (9.6%)                         | 54 (65.9%)           | <0.001  | 8 (16.7%)            | 34 (72.3%)           | <0.001  | 1.02 (0.35, 2.95)                    | 0.971   | 0.92 (0.31, 2.74)  | 0.887   |
| 1-6 times per day | 51 (61.4%)                       | 10 (12.2%)           |         | 29 (60.4%)           | 8 (17.0%)            |         | 1                                    |         | 1                  |         |
| < daily           | 24 (28.9%)                       | 18 (22.0%)           |         | 11 (22.9%)           | 5 (10.6%)            |         | 3.38 (0.65, 17.58)                   | 0.148   | 3.12 (0.57, 16.97) | 0.189   |

<sup>1</sup>All within group change values referred as Chi-square ( $\chi^2$ )

<sup>2</sup>Model 1: Adjusted for baseline value of outcome, Model 2: Adjusted for baseline value of outcome and sex

<sup>3</sup>Odds ratio from Multinomial Logistic regression

## DISCUSSION

### Statement of the principal findings and possible explanations

Contrary to the study hypothesis, a group-based GSD programme among persons with Type 1 DM and chronically elevated HbA<sub>1c</sub> did not improve the medical outcomes (glycaemic control, frequency of SMBG, perceived competence for diabetes management, perception of healthcare professionals being supportive of patient autonomy). The hypothesis regarding improvement of psychological functioning was partly confirmed, with improvement in the level of autonomy-motivated behaviour, psychological distress and self-esteem, but not the level of overall well-being.

Long-standing elevated HbA<sub>1c</sub> appears to be a complex and heterogenous phenomenon [32] and educational programs have been evaluated for their effectiveness for improving glycaemic control [13, 33, 34]. Some researchers indicate that evaluation studies need to better understand the complexity of variance in HbA<sub>1c</sub> [35]. The present study revealed a substantial decrease in HbA<sub>1c</sub> in both groups, with no difference between groups. It is likely that the change in CG HbA<sub>1c</sub> was driven by the ‘observer effect,’ i.e., that individuals modify or improve their behavior in response to their awareness of being observed [36]. As an additional quality of metabolic control follow-up data on mild or severe hypoglycaemia could have been evaluated, but was not assessed.

### Strengths of the study in relation to other studies

Strengths of the study include the random assignment of patients and their heterogeneity. The GSD-GT intervention demonstrated a significant improvement in diabetes distress. There were no between-group differences in diabetes distress at baseline among those completing the study. The GSD-GT study group consisted of persons with a rather substantial level of self-reported diabetes distress (43% scoring  $\geq 40$  on the PAID scale) at baseline, comparable

1  
2  
3 to previous research [19]. Our results confirm that although a behavioral intervention may not  
4 improve medical outcomes among persons with persistently elevated HbA<sub>1c</sub> psychological  
5 outcomes may improve. This raises the possibility that if interventions resulting in behaviour  
6 change also reduce diabetes distress, the gains in diabetes self-management might be  
7 sustained over the long term, as argued by Zagarins [37].  
8  
9  
10  
11  
12

13  
14 One of the key elements of GSD is to support persons with diabetes to clarify and express  
15 their unique difficulties and barriers to healthy coping. This is done by mobilizing their own  
16 potential for change in interactions with autonomy supportive HCPs and by utilizing semi-  
17 structured reflection sheets. Instead of being instructed by HCPs, the core principle in GSD is  
18 individualized goal setting, a treatment strategy comparable to other behavioral interventions  
19 [14]. In a cross-sectional study HCPs being autonomy supportive was associated with the  
20 perceived level of diabetes distress mediated through the perceived level of diabetes  
21 competence [22]. In the current study, and incongruent with prior research on the GSD  
22 approach [18, 19], there was no change in HCP autonomy support (HCCQ) and level of  
23 diabetes competence (PCDS). However, GSD increased autonomous motivation (TSRQ  
24 Autonomy) and reduced diabetes distress. In terms of patient outcomes, improvement of  
25 autonomous motivation for change is hypothesized to be the key mechanism; autonomy  
26 support from HCPs is merely one strategy for activating that mechanism. Although the  
27 mediation analysis in the current study did not confirm that increasing autonomy mediates  
28 mental health benefits (PAID, DDS Total and RSES), the individual's use of reflection sheets  
29 may play a more important role in GSD. This interpretation is consistent with a recently  
30 published qualitative paper evaluating how a GSD approach could bring about a dramatic  
31 change in a young woman's perception of her diabetes [21].  
32  
33  
34  
35  
36  
37  
38  
39  
40  
41  
42  
43  
44  
45  
46  
47  
48  
49  
50  
51  
52  
53  
54  
55  
56  
57  
58  
59  
60

## Weaknesses of the study and future research

The most obvious limitation of this study is that generalizability might be distorted due to recruitment problems and attrition from the GSD-GT program. As the power calculation premise was violated, the interpretation of the results is challenging. It remains to a certain extent unclear whether the nonsignificant results are attributable to insufficient power, attrition or the effect of the intervention.

Consistent with previous studies, targeting distressed persons with diabetes [38] can be difficult because those with the greatest need for psychological support are most likely to drop out of the psychological intervention. Conversely, those who completed the study had lower levels of diabetes distress and HbA<sub>1c</sub> at baseline, reflecting less need for improvement of competence to manage the every-day aspects of their diabetes care. Perhaps future research on behavioral interventions, especially GSD, should assess patient interest in making changes prior to randomization so that study participants are appropriate for the intervention.

In the present study, the failure to achieve the primary study goal could possibly be explained by incongruence between the research focus on medical outcomes and participants' possibly prioritizing aspects of life other than clinical improvements. Consequently, it is important to assess individual goals in future research using personalized approaches to improving outcomes. In line with the DAWN2 study, there are still unmet needs of people with diabetes and those who care for them, and promotion of innovative efforts to improve self-management and life skills performance should be facilitated [39]. Efforts to manage emotional distress have been suggested as an integral part of diabetes care [40]. Improving psychosocial outcomes requires a shift away from a purely medical model to a person-centered model with greater emphasis on psychosocial aspects. Barnard and colleagues have advocated a holistic model of diabetes care aiming at enhanced diabetes self-management and



1  
2  
3 improved outcomes by considering intrinsic thoughts, as well as the environment and therapy  
4  
5 regimen [41].  
6  
7

### 8 **Implications for clinicians**

9

10 The present study exemplifies a complex behavioral intervention with feasibility challenges  
11 and does not confirm improvements in HbA<sub>1c</sub> and other medical outcomes. However,  
12  
13 autonomous motivation improved and might be one mechanism for reducing diabetes distress.  
14  
15  
16  
17  
18  
19  
20  
21  
22

### 23 **Figure legend:**

24

25  
26 *Fig. 1. Study flow diagram*  
27  
28  
29  
30  
31  
32  
33  
34  
35  
36  
37  
38  
39  
40  
41  
42  
43  
44  
45  
46  
47  
48  
49  
50  
51  
52  
53  
54  
55  
56  
57  
58  
59  
60

## Acknowledgements

The authors wish to thank all of the diabetes specialist nurses at the outpatient clinic for their contribution to the data collection and the GSD-trained nurses for participating. We also wish to thank all study participants for their valuable contributions and psychiatrist Jorunn Torgauten, Haukeland University Hospital for her appreciated assistance to secure fidelity to the methodology and appropriate treatment to persons revealing profound psychological issues.

### a. Contributorship statement:

JM, MG, BR, VZ and HT contributed to conception and design of the study. JM collected the data. JM, JA and MP gave substantial contribution to the analysis and interpretation of data. JM wrote the first draft of this manuscript and MG, BR, and MP gave substantial contributions to the interpretation of data and revised the manuscript critically. VZ and HT gave substantial contributions to the intellectual content of the manuscript and revised the manuscript critically. All authors read and contributed to the final draft of the paper.

### b. Competing interests:

Conflict of interests: Author MP declared the following potential conflict of interest: Consulting fees from Astra Zeneca, Calibra, Lilly, and Novo Nordisk; advisory panel of GlaxcoSmithCline, Lilly, and Novo Nordisk; research grants from Novo Nordisk; Speaker for Novo Nordisk. The remaining authors declare that they have no conflict of interest.

### c. Funding:

The study was supported by The Western Norway Regional Health Authority; The Norwegian Diabetes Association; The Norwegian Nurses Organisation and Bergen University College.

1  
2  
3 **d. Data sharing statement:**  
4

5 No additional data available  
6  
7  
8  
9  
10  
11  
12  
13  
14  
15  
16  
17  
18  
19  
20  
21  
22  
23  
24  
25  
26  
27  
28  
29  
30  
31  
32  
33  
34  
35  
36  
37  
38  
39  
40  
41  
42  
43  
44  
45  
46  
47  
48  
49  
50  
51  
52  
53  
54  
55  
56  
57  
58  
59  
60

For peer review only

1. Clark M. Diabetes self-management education: a review of published studies. *Prim Care Diabetes* 2008; **2**:113-120.
2. Haas L, Maryniuk M, Beck J, Cox CE, Duker P, Edwards L, *et al*. National standards for diabetes self-management education and support. *Diabetes care* 2013; **36 Suppl 1**:S100-108.
3. Ryan RM, Deci EL. Self-determination theory and the facilitation of intrinsic motivation, social development, and well-being. *Am Psychol* 2000; **55**:68-78.
4. Peyrot M, Rubin RR, Funnell MM, Siminerio LM. Access to diabetes self-management education: results of national surveys of patients, educators, and physicians. *The Diabetes educator* 2009; **35**:246-248, 252-246, 258-263.
5. Peyrot M, Rubin RR, Lauritzen T, Snoek FJ, Matthews DR, Skovlund SE. Psychosocial problems and barriers to improved diabetes management: results of the Cross-National Diabetes Attitudes, Wishes and Needs (DAWN) Study. *Diabetic medicine : a journal of the British Diabetic Association* 2005; **22**:1379-1385.
6. Zoffmann V, Kirkevold M. Life versus disease in difficult diabetes care: conflicting perspectives disempower patients and professionals in problem solving. *Qual Health Res* 2005; **15**:750-765.
7. Livingstone SJ, Looker HC, Hothersall EJ, Wild SH, Lindsay RS, Chalmers J, *et al*. Risk of cardiovascular disease and total mortality in adults with type 1 diabetes: Scottish registry linkage study. *PLoS medicine* 2012; **9**:e1001321.
8. El Achhab Y, Nejari C, Chikri M, Lyoussi B. Disease-specific health-related quality of life instruments among adults diabetic: A systematic review. *Diabetes research and clinical practice* 2008; **80**:171-184.
9. American Diabetes Association. Standards of medical care in diabetes--2007. *Diabetes Care* 2007; **30 Suppl 1**:S4-S41.
10. Muhlhauser I, Bruckner I, Berger M, Cheta D, Jorgens V, Ionescu-Tirgoviste C, *et al*. Evaluation of an intensified insulin treatment and teaching programme as routine management of type 1 (insulin-dependent) diabetes. The Bucharest-Dusseldorf Study. *Diabetologia* 1987; **30**:681-690.
11. Fitzpatrick SL, Schumann KP, Hill-Briggs F. Problem solving interventions for diabetes self-management and control: a systematic review of the literature. *Diabetes Res Clin Pract* 2013; **100**:145-161.
12. Group DS. Training in flexible, intensive insulin management to enable dietary freedom in people with type 1 diabetes: dose adjustment for normal eating (DAFNE) randomised controlled trial. *Bmj* 2002; **325**:746.
13. Hopkins D, Lawrence I, Mansell P, Thompson G, Amiel S, Campbell M, *et al*. Improved biomedical and psychological outcomes 1 year after structured education in flexible insulin therapy for people with type 1 diabetes: the U.K. DAFNE experience. *Diabetes Care* 2012; **35**:1638-1642.
14. Hermanns N, Kulzer B, Ehrmann D, Bergis-Jurgan N, Haak T. The effect of a diabetes education programme (PRIMAS) for people with type 1 diabetes: results of a randomized trial. *Diabetes Res Clin Pract* 2013; **102**:149-157.
15. Muller N, Kloos C, Samann A, Wolf G, Muller UA. Evaluation of a treatment and teaching refresher programme for the optimization of intensified insulin therapy in type 1 diabetes. *Patient Educ Couns* 2013; **93**:108-113.
16. Zoffmann V, Kirkevold M. Realizing empowerment in difficult diabetes care: a guided self-determination intervention. *Qual Health Res* 2012; **22**:103-118.
17. Olesen ML, Duun-Henriksen AK, Hansson H, Ottesen B, Andersen KK, Zoffmann V. A person-centered intervention targeting the psychosocial needs of gynecological cancer survivors: a randomized clinical trial. *Journal of cancer survivorship : research and practice* 2016.
18. Zoffmann V, Lauritzen T. Guided self-determination improves life skills with type 1 diabetes and A1C in randomized controlled trial. *Patient Educ Couns* 2006; **64**:78-86.
19. Zoffmann V, Vistisen D, Due-Christensen M. Flexible guided self-determination intervention for younger adults with poorly controlled Type 1 diabetes, decreased HbA and psychosocial distress in women but not in men: a real-life RCT. *Diabet Med* 2015.

- 1  
2  
3 20. Husted GR, Thorsteinsson B, Esbensen BA, Glud C, Winkel P, Hommel E, *et al.* Effect of  
4 guided self-determination youth intervention integrated into outpatient visits versus treatment as  
5 usual on glycemic control and life skills: a randomized clinical trial in adolescents with type 1  
6 diabetes. *Trials* 2014; **15**:321.
- 7 21. Zoffmann V, Prip A, Christiansen AW. Dramatic change in a young woman's perception of her  
8 diabetes and remarkable reduction in HbA1c after an individual course of Guided Self-Determination.  
9 *BMJ Case Rep* 2015; **2015**.
- 10 22. Mohn J, Graue M, Assmus J, Zoffmann V, H BT, Peyrot M, *et al.* Self-reported diabetes self-  
11 management competence and support from healthcare providers in achieving autonomy are  
12 negatively associated with diabetes distress in adults with Type 1 diabetes. *Diabet Med* 2015.
- 13 23. Hoelzel W, Weykamp C, Jeppsson JO, Miedema K, Barr JR, Goodall I, *et al.* IFCC reference  
14 system for measurement of hemoglobin A1c in human blood and the national standardization  
15 schemes in the United States, Japan, and Sweden: a method-comparison study. *Clinical chemistry*  
16 2004; **50**:166-174.
- 17 24. Hermanns N, Kulzer B, Krichbaum M, Kubiak T, Haak T. How to screen for depression and  
18 emotional problems in patients with diabetes: comparison of screening characteristics of depression  
19 questionnaires, measurement of diabetes-specific emotional problems and standard clinical  
20 assessment. *Diabetologia* 2006; **49**:469-477.
- 21 25. Polonsky WH, Fisher L, Earles J, Dudl RJ, Lees J, Mullan J, *et al.* Assessing psychosocial distress  
22 in diabetes: development of the diabetes distress scale. *Diabetes Care* 2005; **28**:626-631.
- 23 26. Williams GC, McGregor HA, King D, Nelson CC, Glasgow RE. Variation in perceived  
24 competence, glycemic control, and patient satisfaction: relationship to autonomy support from  
25 physicians. *Patient Educ Couns* 2005; **57**:39-45.
- 26 27. Alessandri G, Vecchione M, Eisenberg N, Laguna M. On the factor structure of the Rosenberg  
27 (1965) General Self-Esteem Scale. *Psychological assessment* 2015; **27**:621-635.
- 28 28. Hajos TR, Pouwer F, Skovlund SE, Den Oudsten BL, Geelhoed-Duijvestijn PH, Tack CJ, *et al.*  
29 Psychometric and screening properties of the WHO-5 well-being index in adult outpatients with Type  
30 1 or Type 2 diabetes mellitus. *Diabet Med* 2013; **30**:e63-69.
- 31 29. Williams GC, McGregor HA, Zeldman A, Freedman ZR, Deci EL. Testing a self-determination  
32 theory process model for promoting glycemic control through diabetes self-management. *Health*  
33 *Psychol* 2004; **23**:58-66.
- 34 30. Levesque CS, Williams GC, Elliot D, Pickering MA, Bodenhamer B, Finley PJ. Validating the  
35 theoretical structure of the Treatment Self-Regulation Questionnaire (TSRQ) across three different  
36 health behaviors. *Health Educ Res* 2007; **22**:691-702.
- 37 31. Organization WH. Process of translation and adaptation of instruments. 2015.
- 38  
39  
40  
41 32. Devries JH, Snoek FJ, Heine RJ. Persistent poor glycaemic control in adult Type 1 diabetes. A  
42 closer look at the problem. *Diabet Med* 2004; **21**:1263-1268.
- 43 33. Hill-Briggs F, Gemmell L. Problem solving in diabetes self-management and control: a  
44 systematic review of the literature. *Diabetes Educ* 2007; **33**:1032-1050; discussion 1051-1032.
- 45 34. Bott U, Bott S, Hemmann D, Berger M. Evaluation of a holistic treatment and teaching  
46 programme for patients with Type 1 diabetes who failed to achieve their therapeutic goals under  
47 intensified insulin therapy. *Diabet Med* 2000; **17**:635-643.
- 48 35. Rogvi S, Tapager I, Almdal TP, Schiotz ML, Willaing I. Patient factors and glycaemic control--  
49 associations and explanatory power. *Diabet Med* 2012; **29**:e382-389.
- 50 36. Shadish WR, Cook TD, Campbell DT. Experimental and quasi-experimental designs for  
51 generalized causal inference. New York: Houghton Mifflin Company; 2002.
- 52 37. Zagarins SE, Allen NA, Garb JL, Welch G. Improvement in glycemic control following a  
53 diabetes education intervention is associated with change in diabetes distress but not change in  
54 depressive symptoms. *J Behav Med* 2012; **35**:299-304.
- 55  
56  
57  
58  
59  
60

- 1  
2  
3 38. van Son J, Nyklicek I, Pop VJ, Blonk MC, Erdtsieck RJ, Spooren PF, *et al*. The effects of a  
4 mindfulness-based intervention on emotional distress, quality of life, and HbA(1c) in outpatients with  
5 diabetes (DiaMind): a randomized controlled trial. *Diabetes Care* 2013; **36**:823-830.  
6 39. Nicolucci A, Kovacs Burns K, Holt RI, Comaschi M, Hermanns N, Ishii H, *et al*. Diabetes  
7 Attitudes, Wishes and Needs second study (DAWN2): cross-national benchmarking of diabetes-  
8 related psychosocial outcomes for people with diabetes. *Diabet Med* 2013; **30**:767-777.  
9 40. Gonzales R, Handley MA. Improving glycemic control when "usual" diabetes care is not  
10 enough. *Arch Intern Med* 2011; **171**:1999-2000.  
11 41. Barnard KD, Lloyd CE, Dyson PA, Davies MJ, O'Neil S, Naresh K, *et al*. Kaleidoscope model of  
12 diabetes care: time for a rethink? *Diabet Med* 2014; **31**:522-530.  
13  
14  
15  
16  
17  
18  
19  
20  
21  
22  
23  
24  
25  
26  
27  
28  
29  
30  
31  
32  
33  
34  
35  
36  
37  
38  
39  
40  
41  
42  
43  
44  
45  
46  
47  
48  
49  
50  
51  
52  
53  
54  
55  
56  
57  
58  
59  
60

For peer review only

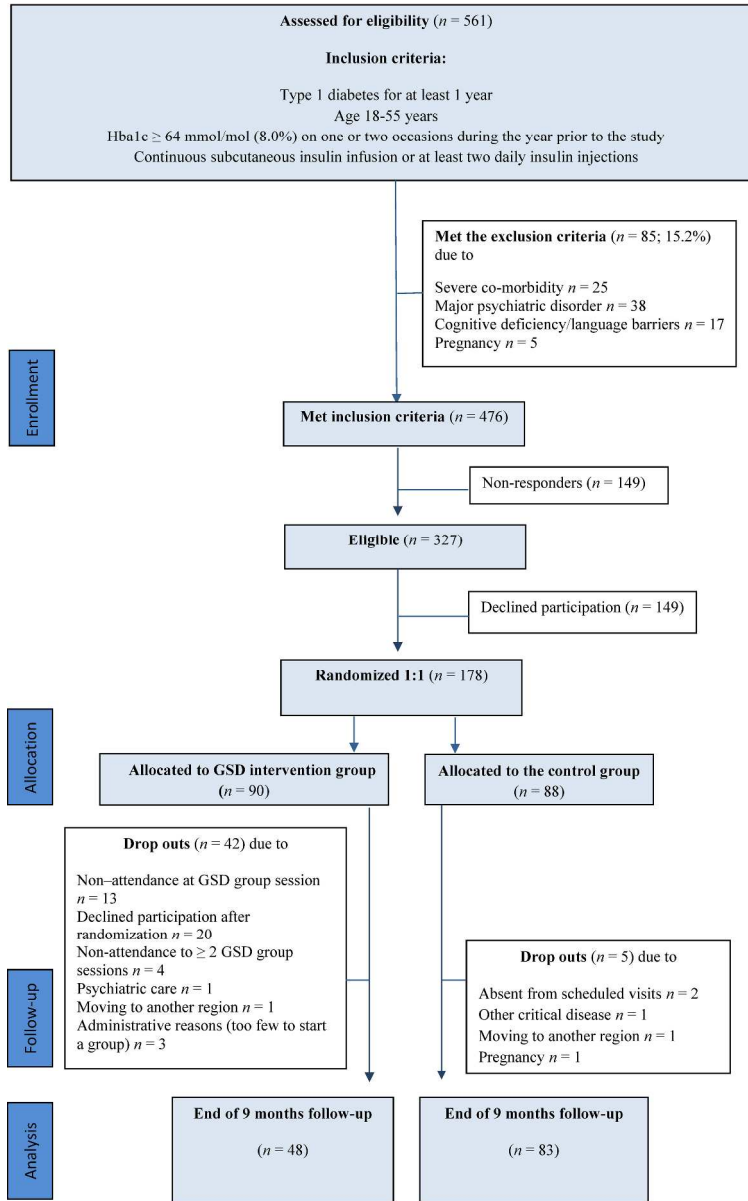

Fig. 1. Study flow diagram

268x427mm (300 x 300 DPI)

# BMJ Open

## The effect of Guided Self-Determination on self-management in persons with Type 1 diabetes mellitus and HbA1c $\geq$ 64 mmol/mol – a group-based randomized controlled trial

|                                 |                                                                                                                                                                                                                                                                                                                                                                                                  |
|---------------------------------|--------------------------------------------------------------------------------------------------------------------------------------------------------------------------------------------------------------------------------------------------------------------------------------------------------------------------------------------------------------------------------------------------|
| Journal:                        | <i>BMJ Open</i>                                                                                                                                                                                                                                                                                                                                                                                  |
| Manuscript ID                   | bmjopen-2016-013295.R2                                                                                                                                                                                                                                                                                                                                                                           |
| Article Type:                   | Research                                                                                                                                                                                                                                                                                                                                                                                         |
| Date Submitted by the Author:   | 20-Mar-2017                                                                                                                                                                                                                                                                                                                                                                                      |
| Complete List of Authors:       | Mohn, Jannike; Hogskolen i Bergen, Centre for Evidence-Based Practice<br>Graue, Marit; Bergen Univ Coll<br>Assmus, Jörg; Haukeland Universitetssjukehus<br>Zoffmann, Vibeke; University Hospital of Copenhagen<br>Thordarson, Hrafnkell; Haukeland Universitetssjukehus<br>Peyrot, Mark; Loyola University Maryland<br>Rokne, Berit; Universitetet i Bergen Det medisinsk-odontologiske fakultet |
| <b>Primary Subject Heading</b>: | Diabetes and endocrinology                                                                                                                                                                                                                                                                                                                                                                       |
| Secondary Subject Heading:      | Patient-centred medicine, Communication                                                                                                                                                                                                                                                                                                                                                          |
| Keywords:                       | General diabetes < DIABETES & ENDOCRINOLOGY, self-management, diabetes distress, educational method, psychological functioning, HbA1c                                                                                                                                                                                                                                                            |
|                                 |                                                                                                                                                                                                                                                                                                                                                                                                  |

SCHOLARONE™  
Manuscripts



1  
2  
3 The effect of Guided Self-Determination on self-management in  
4 persons with Type 1 diabetes mellitus and  $HbA_{1c} \geq 64$  mmol/mol – a  
5 group-based randomized controlled trial  
6  
7

8 Running head:  
9

10 Effect of a behavioral intervention among adults with Type 1 DM and chronically elevated  
11  $HbA_{1c}$   
12  
13

14  
15 Jannike Mohn, RN./Master of Health Science<sup>1\*2 5</sup>  
16

17 M. Graue, RN./PhD<sup>1 6</sup>  
18

19 J. Assmus, PhD<sup>3</sup>  
20

21 V. Zoffmann, RN./PhD<sup>4</sup>  
22

23 H. Thordarson, MD.<sup>5</sup>  
24

25 M. Peyrot, PhD<sup>1 7</sup>  
26

27 B. Rokne, RN./PhD<sup>2 8</sup>  
28

29 <sup>1</sup>*Western Norway University of Applied Sciences, Centre for Evidence-Based Practice,  
30 Norway*

31 <sup>2</sup>*University of Bergen, Department of Global Public Health and Primary Care, Norway*

32 <sup>3</sup>*Haukeland University Hospital, Centre for Clinical Research, Norway*

33 <sup>4</sup>*Research Unit Women's and Children's Health, The Juliane Marie Centre, Copenhagen  
34 University Hospital, Rigshospitalet, Copenhagen, Denmark*

35 <sup>5</sup>*Haukeland University Hospital, Dept. of Medicine, Section of Endocrinology, Norway*

36 <sup>6</sup>*Haukeland University Hospital, Dept. of Pediatrics, Norway*  
37

38 <sup>7</sup>*Department of Sociology, Loyola University Maryland, Baltimore, MD, USA*  
39

40 <sup>8</sup>*Haukeland University Hospital, Dept. for Research and Development, Norway*  
41  
42  
43

44 \*Corresponding author:  
45

46 Jannike Mohn

47 E-mail: [jmo@hvl.no](mailto:jmo@hvl.no) or [jmoh@helse-bergen.no](mailto:jmoh@helse-bergen.no)

48 Mailing address: Western Norway University of Applied Sciences, Centre for  
49 Evidence-Based practice,  
50

51 P.O box 7030, N-5063 Bergen, Norway

52 Phone: + 47 55 58 75 00 or Mobile +47 91 71 91 54  
53  
54  
55  
56  
57  
58  
59  
60

## Abstract

**Objectives:** To determine whether the impact of Guided Self-Determination (GSD) applied in group training (GSD-GT) in people with chronically elevated HbA<sub>1c</sub> and Type 1 diabetes mellitus (DM) was superior to 'care as usual' in improving HbA<sub>1c</sub> and psychological functioning.

**Setting:** An out-patient clinic at a university hospital in Western Norway.

**Participants:** 178 adults (all Caucasian) aged 18-55 (mean age 36.7 ±10.7, 62% women) with Type 1 DM for at least one year and HbA<sub>1c</sub> ≥ 64 mmol/mol (8.0%) were randomly assigned to participate in either GSD-GT or a control group. Exclusion criteria were severe co-morbidity, major psychiatric disorder, cognitive deficiency/language barriers and pregnancy.

**Intervention:** Intervention group met 7 times for 2 hours over 14 weeks to promote patient autonomy and intrinsic motivation using reflection sheets and advanced professional communication in accordance with the GSD methodology.

**Primary and secondary outcome measures:** The primary outcome was HbA<sub>1c</sub> and secondary outcomes (all outcomes 9 months post-intervention) were self-monitored blood glucose (SMBG) frequency, self-reported diabetes competence (PCDS), autonomy support by health-care providers (HCCQ), autonomous versus controlled diabetes motivation (TSRQ), diabetes distress (PAID and DDS), self-esteem (RSES) and psychological well-being (WHO-5 scale).

**Results:** Among participants allocated to the GSD-GT (*n* = 90) 48 completed the study, whereas 83 completed in the CG (*n* = 88). With 95% confidence intervals (CI) GSD-GT did not have effect on HbA<sub>1c</sub> (B -0.18, CI (-0.48, 0.12), *p*=0.234). GSD-GT improved autonomy-motivated behaviour (B 0.51, CI (0.25, 0.77), *p*<0.001), diabetes distress (PAID, B -6.96, CI (-11.40, -2.52), *p*=0.002; total DDS, B -5.15, CI (-9.34, -0.96), *p*=0.016; DDS Emotional

1  
2  
3 burden, B -7.19, CI (-13.20, -1.19)  $p=0.019$ ) and self-esteem (B 1.43, CI (0.34, 2.52),  
4  
5  $p=0.011$ ).

6  
7 Conclusions: Results from this behavioral intervention must be interpreted cautiously because  
8  
9 of recruitment and attrition problems. Medical outcomes did not improve. Psychological  
10  
11 outcomes improved, especially reduced diabetes distress.  
12

13  
14  
15  
16  
17  
18  
19  
20 Trial registration: Clinical Trials.gov with identification number NCT 01317459.  
21  
22  
23  
24  
25  
26  
27  
28  
29  
30  
31  
32  
33  
34  
35  
36  
37  
38  
39  
40  
41  
42  
43  
44  
45  
46  
47  
48  
49  
50  
51  
52  
53  
54  
55  
56  
57  
58  
59  
60

## Article summary

### Strengths and limitations of this study

- This study evaluated the effect of a person-centered behavioral intervention among adults with Type 1 DM, scarcely evaluated in the literature compared to educational programmes among persons with Type 2 DM
- Targeting persons with Type 1 DM and chronically elevated HbA<sub>1c</sub> is a challenge because long-standing poor glycaemic control appears to be a complex and heterogenous phenomenon
- The most obvious limitation of this study is that generalizability might be distorted due to recruitment problems, and attrition from the GSD-GT program

## Introduction

Diabetes is considered a demanding condition requiring complex self-management tasks for the individual. Effective self-management is a prerequisite for preventing long-term complications and the immediate risk of hypoglycaemia. Researchers underscore that diabetes self-management education is an ongoing process rather than a one-time event [1]. American Diabetes Association (ADA) National Standards for Diabetes Self-Management Education and Support hold that self-management does not stop when a person with diabetes leaves the educator's office [2]. Consequently, motivation is a key concept, and one based on respect for the individual's autonomy is essential as it is connected with success in reaching and maintaining goals [3]. Therefore, the challenge for health-care professionals (HCPs) is to implement an autonomy supportive approach instead of one based on control or disclaimed responsibility [4]. Considerable barriers to such an approach exist [5] and personal problems in living with the illness might remain unclarified and unresolved [6]. This can contribute to the 37-56% of people with Type 1 DM who are living with blood sugar above target levels [7] and at increased risk of late complications together with poor quality of life [8]. The ADA states that diabetes care is often suboptimal; lacking are collaborative, multidisciplinary teams well suited to provide appropriate self-management education among persons with diabetes [9].

One of the first structured diabetes treatment and education programmes for Type 1 DM was developed between 1980 and 1990 [10]. While many trials have evaluated the effect of diabetes education programs in Type 2 DM, there is still a paucity of trials evaluating evidence-based self-management programmes promoting empowerment in adults with Type 1 DM [11]. Among persons with Type 1 DM the DAFNE (Dose Adjustment for Normal Eating) education programme showed significant improvements in HbA<sub>1c</sub> in the early stage of the trial [12] but more modest longer-term improvements [13]. A self-management-oriented

1  
2  
3 education programme (PRIMAS) showed effect on glycaemic control and reduced diabetes  
4  
5 distress at six months follow-up compared with an established education programme in a  
6  
7 multi-centre trial [14]. In an uncontrolled evaluation of the DTTP (Diabetes Teaching and  
8  
9 Treatment Programme) persons with moderately controlled Type 1 DM improved their HbA<sub>1c</sub>  
10  
11 and treatment satisfaction [15].  
12

13  
14 Guided Self-Determination (GSD) is a theory- and evidence-based problem-solving method  
15  
16 to overcome barriers to collaborative care. It is based on life skills theory, dynamic  
17  
18 judgement-building and theories about behaviour change. GSD promotes patient autonomy,  
19  
20 participation, skills building and intrinsic motivation [16]. The method is applicable in group  
21  
22 training (GSD-GT) or individual care for a variety of conditions. In a recent study, GSD  
23  
24 improved physical well-being in women surgically treated for gynaecological cancer [17]. For  
25  
26 persons with Type 1 DM the GSD methodology has demonstrated some success. The first  
27  
28 randomized controlled trial among adults showed significant improvement in glycaemic  
29  
30 control and life-skills [18]. In later studies GSD proved to be either borderline effective or not  
31  
32 effective concerning glycaemic control among younger adults/adolescents; however, it  
33  
34 reduced diabetes distress and lack of motivation and improved diabetes competence among  
35  
36 young adult women [19, 20]. In addition, a case report on a young woman showed  
37  
38 considerable reduction in HbA<sub>1c</sub> after a GSD intervention [21]. In conclusion, GSD seems  
39  
40 worthy of further research for several reasons. First, patient involvement and person-centered  
41  
42 care are highly appreciated and recommended, but difficult to implement as part of clinical  
43  
44 care [22]. Second, GSD is one of few interventions which clinicians are able to facilitate in  
45  
46 routine clinical care after rather short training. Third, persons with diabetes have a primary  
47  
48 role in GSD, spending their time at home clarifying what is important for them to change and  
49  
50 becoming able to express their thoughts in communication with HCPs. Consequently,  
51  
52 efficiency of patient-provider communication increases without extra use of HCP resources.  
53  
54  
55  
56  
57  
58  
59  
60

1  
2  
3 Last, GSD has the potential for improvement of HbA<sub>1c</sub>, as well as increased self-  
4  
5 determination and decrease of diabetes-related burden [18]. This randomized intervention  
6  
7 study tests whether GSD-GT is superior to 'care as usual' (CU) in improving glycaemic  
8  
9 control and psychological functioning among adults with suboptimally regulated Type 1 DM.  
10

## 11 12 **PATIENTS AND METHODS**

### 13 14 15 **Design**

16  
17 This study was a prospective, randomized trial with a control group and a treatment group.  
18  
19 Participants were recruited from an out-patient setting at a university hospital in Western  
20  
21 Norway. The hospital's population is ethnically homogeneous, and includes both urban and  
22  
23 rural populations. To test the effect of GSD persons with Type 1 DM and suboptimal  
24  
25 metabolic control were invited to participate in an educational group treatment intervention  
26  
27 (GSD-GT) or care as usual control group, (CG). The Regional Committee for Medical and  
28  
29 Health Research Ethics approved the study (approval number 2010/1325), and gave access to  
30  
31 the age, gender and HbA<sub>1c</sub> of non-responders. Participants gave written informed consent.  
32  
33  
34  
35

### 36 37 **Recruitment**

38  
39 From March 2011 to March 2013 all persons with Type 1 DM attending consultations at the  
40  
41 university hospital (n=561) were assessed for eligibility according to the inclusion criteria  
42  
43 (Fig. 1). Further details on inclusion and exclusion criteria are outlined elsewhere [23]. A pre-  
44  
45 study power calculation for a t-test assuming a 0.05 significance level and a power of 0.8  
46  
47 expecting 25% drop-out and a difference of 0.6% change in HbA<sub>1c</sub> (SD 1.3) between groups  
48  
49 led to 218 participants needed to include. Expected change in HbA<sub>1c</sub> was based on clinical  
50  
51 relevance.  
52  
53  
54  
55  
56  
57  
58  
59  
60

1  
2  
3 After identifying 476 people who met study criteria a request was sent by post 1-3 weeks in  
4  
5 advance of their next clinical consultation, inviting them to take part in the study. To those  
6  
7 who neither responded to the request nor attended at the clinic appointment an additional  
8  
9 letter was sent. If still no response nor attendance at the clinic, they were classified as non-  
10  
11 responders ( $n = 149$ ). Another 149 persons actively declined participation. Their response was  
12  
13 given when they were at the clinic, or by telephone if they were unable to meet for their  
14  
15 scheduled appointment. Those willing to participate were consented when they were at the  
16  
17 clinic ( $n = 178$ ). The participation rate in the study was 37.4% (178 of the 476 who met  
18  
19 inclusion criteria). Participants received no monetary incentives. All sessions were free of  
20  
21 charge.  
22  
23

## 24 25 **Randomization**

26  
27  
28 The randomization occurred externally and was stratified in computer-generated sequences  
29  
30 unknown to the investigators. Blinding was considered impossible due to the nature of the  
31  
32 intervention and was not attempted. Participants were randomized to either the usual care CG  
33  
34 ( $n = 88$ ; M/W:  $n = 40/48$ ) or GSD-GT ( $n = 90$ ; M/W:  $n = 26/64$ ). The groups consisted of a  
35  
36 minimum of two and a maximum of seven participants. Each GSD training group was  
37  
38 balanced according to sex and age, preferably an equal number of men and women in each  
39  
40 group and age ranging  $\pm 6$  years.  
41  
42  
43

44 In the CG and GSD-GT conditions five and forty-two participants were lost to follow-up,  
45  
46 respectively; thus 131 participants (74%) completed the trial. The reasons for drop-out in both  
47  
48 study groups, and the total flow of participants through each stage of the trial is depicted in  
49  
50 Fig. 1.  
51  
52  
53  
54  
55  
56  
57  
58  
59  
60



## Intervention

The GSD intervention was based on a technique by which the HCPs encourage people with diabetes to reflect on different problem areas concerning their daily lives with diabetes and develop autonomous motivation for life style changes. The technique was partly built on semi-structured work sheets filled in before and between each appointment, making the people with diabetes prepared with enhanced self-insight and ability to talk about personal difficulties. The perceived obstacles and barriers were responded to by HCPs with specific communication skills who conducted each consultation consistent with the GSD methodology [18]. Intervention-group participants met 7 times for 2 hour sessions over 14 weeks. Two GSD-trained diabetes specialist nurses supervised each session. Nurses were given 1 hour per week group-based feedback to secure fidelity to the protocol. No GSD-GT participants received additional treatment during the intervention period, except two participants who needed one extra consultation because of technical problems with their insulin pumps.

The control group received traditional out-patient consultations, 'care as usual', consisting of individual counseling by nurses, physicians or dieticians, with measurements of HbA<sub>1c</sub> and advice on how to improve glycaemic control. No control-group participants met with GSD-trained nurses during the intervention period.

## Assessments

Participant characteristics were assessed at baseline. Primary and secondary outcome measurements were planned to be performed at baseline and 9 months after the last session of group intervention (GSD-GT) or 9 months after inclusion (CG). Because of the need to get enough participants to start group sessions there was a large variation in time from randomization to start of intervention in the IG (Mean=4.9 months, SD=3.6). There was also some variation in time from baseline to follow-up in the CG (Mean=10.9 months, SD=2.4)

1  
2  
3 and time from last session to follow-up in the IG (Mean 9.3 months, SD=1.0) because many  
4  
5 participants needed several reminders before they handed in the follow-up questionnaire.  
6  
7

### 8 **Primary outcome measure**

9  
10 The primary endpoint was glycaemic control (HbA<sub>1c</sub>) which was assessed in connection with  
11  
12 a regularly scheduled visit at the hospital. The blood samples were analysed using high-  
13  
14 performance liquid chromatography (DCA Vantage/Siemens, DCA 2000 and DCA  
15  
16 2000+/Bayer), assays standardized and calibrated against the IFCC – (International  
17  
18 Federation of Clinical Chemists) standards [24].  
19  
20  
21

### 22 **Secondary outcome measures**

23  
24 All participants reported the number of self-monitored blood glucose measurements (SMBGs)  
25  
26 completed in the past two weeks in the following six categories: ‘seven or more  
27  
28 measurements per day’, ‘four to six measurements per day’, ‘one to three measurements per  
29  
30 day’, ‘less than every day’, ‘less than every week’ and ‘no monitoring last 14 days’. Due to  
31  
32 small size of some categories we chose to collapse into the following three categories: ‘seven  
33  
34 or more measurements per day’, ‘one to six measurements per day’, and ‘less than daily  
35  
36 measurements’. Participants also completed seven self-report instruments assessing aspects of  
37  
38 psychological functioning consistent with the theoretical framework of GSD.  
39  
40  
41

42  
43 The *Problem Areas In Diabetes scale* (PAID) measures negative emotions related to living  
44  
45 with diabetes (range = 0-100 scale); higher scores represent greater distress [25].  
46  
47

48 The *Diabetes Distress Scale* (DDS) measures the level of diabetes distress with an overall  
49  
50 score and 4 subscales: emotional burden, regimen-related, interpersonal-related and medical  
51  
52 care-related distress. The range is 1-6 for each item. Total score is calculated by transforming  
53  
54 the mean score to a 0-100 range. Higher scores represent greater distress [26].  
55  
56  
57

1  
2  
3 The *Perceived Competence for Diabetes Scale* (PCDS) assesses the degree to which persons  
4 with diabetes feel they can manage the every-day aspects of diabetes care. The range is 1-7  
5 for each item and the mean is used as a total score. Higher scores represent greater perceived  
6 competence [27].  
7  
8  
9

10  
11  
12 The *Rosenberg Self-Esteem Scale* (RSES) measures one's overall self-esteem. The range is 1-  
13 4 for each item and total score is calculated as the mean of all items multiplied by 10. Higher  
14 scores represent better self-esteem [28].  
15  
16  
17

18  
19 The *World Health Organization five-item Well-Being Index* (WHO-5) measures emotional  
20 well-being. The range for each item is 0-6 and a total score is calculated by transforming the  
21 sum to a 0-100 range. Higher scores represent better emotional well-being [29].  
22  
23  
24

25  
26 The *Health Care Climate Questionnaire* (HCCQ) assesses patients' perceptions of the degree  
27 to which health-care providers are supportive of autonomy rather than controlling. The range  
28 is 1-7 for each item and total score is calculated as the mean of all items; higher scores  
29 represent greater perceived support for autonomy [30].  
30  
31  
32

33  
34 The *Treatment Self-Regulation Questionnaire* (TSRQ) assesses the diabetes self-care  
35 practices and whether this behavior is self-motivated (autonomous/internal) or controlled  
36 (external) [31]. Each item ranges from 1-7 and behavior scores are calculated as the mean of  
37 items within the internal and external dimensions separately. A relative autonomy index  
38 (TSRQ Relative Autonomy Index) was also calculated.  
39  
40  
41  
42  
43  
44  
45  
46

47 The PCDS, the HCCQ and the TSRQ were translated into Norwegian and back-translated into  
48 English by professional translators, in accordance with the WHO guidelines [32].  
49  
50  
51

## 52 **Statistical analysis**

53  
54  
55  
56 Mann-Whitney U tests and  $\chi^2$  tests were used to assess randomization efficacy by testing for  
57

1  
2 differences in baseline measures. To assess differential attrition members of GSD-GT who  
3 completed the study were compared to those who did not. We fitted a regression model for  
4 each outcome at 9 months to investigate the difference between intervention and control  
5 groups both unadjusted and adjusted for baseline outcome and sex. To take into account  
6 possible bias introduced by the high attrition rate in the intervention group we additionally  
7 adjusted for variables showing unbalanced attrition. We used a linear regression model for all  
8 outcomes except SMBG where a multinomial logistic model was used. We used a linear  
9 regression model to test whether change in SMBG mediated change in HbA<sub>1c</sub> and whether  
10 psychological effects were mediated by increased autonomy.  
11  
12  
13  
14  
15  
16  
17  
18  
19  
20  
21

22 There were no intermediate assessments of questionnaire data; therefore it was not possible to  
23 intention-to-treat analysis for persons who dropped out and per-protocol analyses were thus  
24 performed. HbA<sub>1c</sub> was assessed for those who did not complete the study because it could be  
25 obtained from medical records. Therefore, intention-to-treat analysis of HbA<sub>1c</sub> was  
26 performed. Because of the difference in follow-up time between GSD-GT and CG and  
27 because of the large variation within each group we also did additional analyses where we  
28 estimated the association between change in outcome measures and length of follow-up  
29 within each group. Associations were tested using linear regression with change in outcome  
30 measure as dependent variable and follow-up time in months as independent variable with  
31 adjustment for baseline measurement of the outcome variable. For data analyses, the  
32 statistical software program SPSS Statistics (version 22, Chicago, IL, USA 26 (SPSS Inc.)  
33 was used. Significance level was set to 0.05. Missing values were handled by pairwise  
34 exclusion.  
35  
36  
37  
38  
39  
40  
41  
42  
43  
44  
45  
46  
47  
48  
49  
50  
51  
52  
53  
54  
55  
56  
57  
58  
59  
60

## RESULTS

### Baseline characteristics

The mean age of all subjects in the study sample was 36.7 years ( $\pm 10.7$ ), the median disease duration was 19 years (range = 1-46), 13.5% were unemployed, 96.6% were white and 31.5% had diabetes-related complications. A comparison of the baseline characteristics between the groups (without taking the attrition rate into account) suggests that the randomization was successful for all parameters except sex, in that we found a significant difference in the number of women assigned to the study groups (M/W in the GSD-GT:  $n = 26/64$  (29/71%) versus M/W in the CG:  $n = 37/46$  (45/55%),  $p = 0.022$ ) (results not shown). Baseline characteristics of the sample are presented in Table 1.

Due to the considerable number of drop-outs in GSD-GT, participants were stratified into Follow-up and Lost to Follow-up to analyse the effects of attrition. The only statistically significant difference at baseline between CG and GSD-GT Follow-up was for sex ( $p = 0.047$ ). The GSD-GT Lost to Follow-up participants had poorer baseline glycaemic control and scored higher on diabetes distress (DDS, Subscale 3, Regimen distress) than GSD-GT Follow-up participants. Similarly, there were significantly fewer persons with education at a university level in the GSD-GT Lost to Follow-up group than in the GSD-GT Follow-up group.

Among participants allocated to the CG there were no statistically significant baseline differences between those who fulfilled the trial ( $n = 83$ ) and those who were lost to follow-up ( $n = 5$ , data not shown).

## Primary outcome

As seen in Table 2, HbA<sub>1c</sub> declined significantly within both groups ( $p < 0.001$ ) from baseline to follow-up, with no significant difference between the groups.

## Secondary outcomes

The results for all secondary outcome measures are presented in Table 2, except SMBG (Table 3). Secondary outcomes are clustered into a) medical measures, b) type of motivation and c) psychological measures.

### a) Medical measures

The proportion of SMBG seven times per day or more increased significantly within both groups from baseline to follow-up. There was no significant difference between groups in change at follow-up. The change of HbA<sub>1c</sub> was not mediated by the change of SMBG ( $p = 0.728$ , data not shown). Self-perceived diabetes competence (PCDS) and autonomy support from health care professionals (HCCQ) showed no significant change, neither within nor between groups.

### b) Type of motivation

The TSRQ Relative Autonomy Index showed a significant improvement within the GSD-GT group ( $p = 0.014$ ), and a significant difference between groups in change ( $B = 0.35$ ,  $p = 0.045$ ). This finding was due primarily to a significant improvement in TSRQ Autonomy for GSD-GT relative to CG ( $B = 0.51$ ,  $p < 0.001$ ). TSRQ Control remained unchanged within both groups, with no significant difference between groups.

### c) Psychological measures

1  
2  
3 Participants in the GSD-GT group exhibited a significant reduction in diabetes-related distress  
4 relative to the CG as measured by the PAID, the DDS overall score and the DDS Emotional  
5 burden subscale ( $B = -6.96, p = 0.002$ ;  $B = -5.15, p = 0.016$  and  $B = -7.19, p = 0.019$ ,  
6  
7 respectively). In addition, a reduction in DDS Regimen distress was reported within the GSD-  
8  
9 GT group as well as the CG; the difference in group improvement did not reach significance.  
10  
11 The GSD-GT group showed an increase in self-esteem (RSES) relative to the CG ( $B = 1.43, p$   
12  
13  $= 0.011$ ); the CG experienced a decrease in self-esteem ( $p = 0.027$ ). The level of overall well-  
14  
15 being (WHO-5) showed no significant change, neither within nor between the study groups.  
16  
17 Neither PAID, DDS Total nor RSES were significantly mediated by TSRQ Autonomy  
18  
19 ( $p > 0.070$ , data not shown).  
20  
21  
22  
23  
24

### 25 **Length of follow-up**

26  
27  
28 Results from linear regression analyses for the association between outcome measures and  
29  
30 length of follow-up in the intervention group are shown in Table 4. There were no significant  
31  
32 associations, i.e the change was not larger for patients with longer follow-up. Corresponding  
33  
34 analyses for the control group also showed no significant associations with length of follow-  
35  
36 up (results not shown).  
37  
38  
39  
40

## 41 **DISCUSSION**

### 42 **Statement of the principal findings and possible explanations**

43  
44  
45  
46  
47 Contrary to the study hypothesis, a group-based GSD programme among persons with Type 1  
48  
49 DM and chronically elevated HbA<sub>1c</sub> did not improve the medical outcomes (glycaemic  
50  
51 control, frequency of SMBG, perceived competence for diabetes management, perception of  
52  
53 healthcare professionals being supportive of patient autonomy). The hypothesis regarding  
54  
55 improvement of psychological functioning was partly confirmed, with improvement in the  
56  
57  
58  
59  
60

1  
2  
3 level of autonomy-motivated behaviour, diabetes distress and self-esteem, but not the level of  
4  
5 general psychological well-being.  
6  
7

8  
9 Long-standing elevated HbA<sub>1c</sub> appears to be a complex and heterogenous phenomenon [33]  
10  
11 and educational programs have been evaluated for their effectiveness for improving  
12  
13 glycaemic control [13, 34, 35]. Some researchers indicate that evaluation studies need to  
14  
15 better understand the complexity of variance in HbA<sub>1c</sub> [36]. The present study revealed a  
16  
17 substantial decrease in HbA<sub>1c</sub> in both groups, with no difference between groups. It is likely  
18  
19 that the change in CG HbA<sub>1c</sub> was driven by the ‘observer effect,’ i.e., that individuals modify  
20  
21 or improve their behavior in response to their awareness of being observed [37]. Additional  
22  
23 measures of quality of metabolic control would have been follow-up data on mild or severe  
24  
25 hypoglycaemia, but these were not assessed.  
26  
27

### 28 29 **Strengths of the study in relation to other studies**

30  
31  
32 The GSD-GT intervention demonstrated a significant improvement in diabetes distress. There  
33  
34 were no between-group differences in diabetes distress at baseline among those completing  
35  
36 the study. The GSD-GT study group consisted of persons with a rather substantial level of  
37  
38 self-reported diabetes distress (43% scoring  $\geq 40$  on the PAID scale) at baseline, comparable  
39  
40 to previous research [19]. Our results confirm that although a behavioral intervention may not  
41  
42 improve medical outcomes among persons with persistently elevated HbA<sub>1c</sub> psychological  
43  
44 outcomes may improve. This raises the possibility that if interventions resulting in behaviour  
45  
46 change also reduce diabetes distress, the gains in diabetes self-management might be  
47  
48 sustained over the long term, as argued by Zagarins [38]. One of the key elements of GSD is  
49  
50 to support persons with diabetes to clarify and express their unique difficulties and barriers to  
51  
52 healthy coping. This is done by mobilizing their own potential for change in interactions with  
53  
54 autonomy supportive HCPs and by utilizing semi-structured reflection sheets. Instead of being  
55  
56  
57  
58  
59  
60



1  
2  
3 instructed by HCPs, the core principle in GSD is individualized goal setting, a treatment  
4 strategy comparable to other behavioral interventions [14]. In a cross-sectional study, HCPs  
5 being autonomy supportive was associated with the perceived level of diabetes distress  
6 mediated through the perceived level of diabetes competence [23]. In the current study, and  
7 incongruent with prior research on the GSD approach [18, 19], there was no change in HCP  
8 autonomy support (HCCQ) and level of diabetes competence (PCDS). However, GSD  
9 increased autonomous motivation (TSRQ Autonomy) and reduced diabetes distress. In terms  
10 of patient outcomes, improvement of autonomous motivation for change is hypothesized to be  
11 the key mechanism; autonomy support from HCPs is merely one strategy for activating that  
12 mechanism. Although the mediation analysis in the current study did not confirm that  
13 increasing autonomy mediates mental health benefits (PAID, DDS Total and RSES), the  
14 individual's use of reflection sheets may play a more important role in GSD. This  
15 interpretation is consistent with a recently published qualitative paper evaluating how a GSD  
16 approach could bring about a dramatic change in a young woman's perception of her diabetes  
17 [21].

### 36 **Weaknesses of the study and future research**

37  
38 The most obvious limitation of this study is that generalizability might be distorted due to  
39 recruitment problems and attrition from the GSD-GT program. As the power calculation  
40 premise was violated, the interpretation of the results is challenging. It remains to a certain  
41 extent unclear whether the results are attributable to insufficient power, differential attrition or  
42 the effect of the intervention. However, there was no significant difference in change in  
43 HbA<sub>1c</sub> between GSD-GT participants who completed the study versus those who did not (p-  
44 value from t-test 0.71), indicating that it was not the participants with the poorest effect of the  
45 intervention that dropped out. Because of lacking follow-up questionnaires we were not able  
46  
47  
48  
49  
50  
51  
52  
53  
54  
55  
56  
57  
58  
59  
60

1  
2  
3 to do the same test for psychosocial measurements, but it is reasonable to assume that  
4  
5 differences between drop-outs and completers would mirror what we found for HbA1c.  
6  
7 Nevertheless, it is worthwhile to consider potential reasons for high rates of attrition in the  
8  
9 intervention group. Only four participants dropped out after attending an GSD session,  
10  
11 comparable to the two participants in the CG who did not make their follow-up medical visits.  
12  
13 Most of the dropouts in the GSD-GT group did not attend a single session (33/39), suggesting  
14  
15 some possible interpretations for this post-randomization/pre-participation attrition:  
16  
17 The time from randomization to start of GSD-GT (Mean 4.9 months, SD=3.6) could perhaps  
18  
19 discourage individuals who were highly motivated by time of randomization but considered the  
20  
21 waiting time to be too long until the GSD-GT started. Another aspect might be that some  
22  
23 individuals found the intervention too comprehensive and demanding after more detailed  
24  
25 information was given with regard to the pre-intervention work sheets that participants were  
26  
27 encouraged to fill in before each group session.  
28  
29  
30  
31  
32

33 Another limitation is the difference in length of follow-up between the GSD-GT group and  
34  
35 the CG. We did however not find any association between the changes in outcomes and  
36  
37 length of follow-up in the two groups. Thus, we do not think that the longer follow-up in the  
38  
39 GSD-GT group can explain the reported effects of the intervention. In addition, frequency of  
40  
41 blood sugar measurement were measured using a rather crude categorization which might  
42  
43 cause loss of important information. Using SMBG as a continuous variable would have been  
44  
45 optimal as that would have offered a between-group comparison of the absolute number of  
46  
47 measurements per day. However, when designing this study we considered the variation in  
48  
49 demands of the disease to differ too much from one day to another, making it difficult to give  
50  
51 a valid estimate of the number of measurement per day. We thus choose to use a variable with  
52  
53 six categories, but had to collapse this into three categories because of few patients in each  
54  
55  
56  
57  
58  
59  
60

1  
2  
3 category. We tried different categorizations but did not find any significant intervention  
4  
5 effect.  
6  
7  
8

9 Consistent with previous studies, targeting distressed persons with diabetes [39] can be  
10  
11 difficult because those with the greatest need for psychological support are most likely to drop  
12  
13 out of the psychological intervention. Conversely, those who completed the study had lower  
14  
15 levels of diabetes distress and HbA<sub>1c</sub> at baseline, reflecting less need for improvement of  
16  
17 competence to manage the every-day aspects of their diabetes care. Perhaps future research on  
18  
19 behavioral interventions, especially GSD, should assess patient interest in making changes  
20  
21 prior to randomization so that study participants are appropriate for the intervention.  
22  
23

24 In the present study, the failure to achieve the primary study goal could possibly be explained  
25  
26 by incongruence between the research focus on medical outcomes and participants' possibly  
27  
28 prioritizing aspects of life other than clinical improvements. Consequently, it is important to  
29  
30 assess individual goals in future research using personalized approaches to improving  
31  
32 outcomes. In line with the DAWN2 study, there are still unmet needs of people with diabetes  
33  
34 and those who care for them, and promotion of innovative efforts to improve self-  
35  
36 management and life skills performance should be facilitated [40]. Efforts to manage  
37  
38 emotional distress have been suggested as an integral part of diabetes care [41]. Improving  
39  
40 psychosocial outcomes requires a shift away from a purely medical model to a person-  
41  
42 centered model with greater emphasis on psychosocial aspects. Barnard and colleagues have  
43  
44 advocated a holistic model of diabetes care aiming at enhanced diabetes self-management and  
45  
46 improved outcomes by considering intrinsic thoughts, as well as the environment and therapy  
47  
48 regimen [42].  
49  
50  
51  
52  
53  
54  
55  
56  
57  
58  
59  
60

### Implications for clinicians

The present study exemplifies a complex behavioral intervention with feasibility challenges and does not confirm improvements in HbA<sub>1c</sub> and other medical outcomes. However, autonomous motivation improved and might be one mechanism for reducing diabetes distress.

#### Figure legend:

*Fig. 1. Study flow diagram*

**Table 1** Baseline characteristics of Control group versus GSD Intervention group (N=173)

|                                                  | A. Control group<br>(Completers)<br><br>n=83 | B. GSD Intervention group |                                 | A vs B1<br><br><i>P</i> | B1 vs B2<br><br><i>P</i> |
|--------------------------------------------------|----------------------------------------------|---------------------------|---------------------------------|-------------------------|--------------------------|
|                                                  |                                              | B1<br>Follow-up<br>n=48   | B2<br>Lost to Follow-up<br>n=42 |                         |                          |
| <b>Participants characteristics</b>              |                                              |                           |                                 |                         |                          |
| Sex, women <sup>1 2</sup>                        | 46 (55.4)                                    | 35 (72.9)                 | 29 (69.0)                       | .047                    | .686                     |
| Age, years <sup>3 4</sup>                        | 37.2 (10.9)                                  | 36.9 (9.4)                | 36.3 (11.6)                     | .860                    | .916                     |
| Living alone, yes <sup>1 2</sup>                 | 17 (20.5)                                    | 5 (10.4)                  | 6 (14.3)                        | .138                    | .576                     |
| Education University, yes <sup>1 2</sup>         | 30 (36.1)                                    | 23 (47.9)                 | 10 (23.8)                       | .186                    | .018                     |
| Employed <sup>1 2</sup>                          |                                              |                           |                                 |                         |                          |
| - Fulltime                                       | 54 (65.1)                                    | 34 (70.8)                 | 28 (66.7)                       | .485                    | .464                     |
| - Part-time                                      | 16 (19.3)                                    | 10 (20.8)                 | 7 (16.7)                        |                         |                          |
| - Not working                                    | 13 (15.7)                                    | 4 (8.3)                   | 7 (16.7)                        |                         |                          |
| Diabetes duration, years <sup>3 4</sup>          | 20.6 (11.2)                                  | 18.5 (10.6)               | 18.0 (11.0)                     | .310                    | .694                     |
| Long-term complications, yes <sup>1 2</sup>      | 29 (34.9)                                    | 11 (22.9)                 | 15 (35.7)                       | .150                    | .181                     |
| Treatm.regimen, Insulin Pump, yes <sup>1 2</sup> | 37 (44.6)                                    | 16 (33.3)                 | 20 (47.6)                       | .206                    | .168                     |
| Severe hypoglycemia, yes <sup>1 2</sup>          | 35 (42.7)                                    | 24 (50.0)                 | 13 (31.7)                       | .419                    | .081                     |
| BMI <sup>3 4</sup>                               | 26.0 (4.1)                                   | 25.0 (3.6)                | 25.8 (4.0)                      | .145                    | .333                     |
| <b>Outcomes</b>                                  |                                              |                           |                                 |                         |                          |
| HbA <sub>1c</sub> , mmol/mol <sup>3 4</sup>      | 78 (12.7)                                    | 76 (10.4)                 | 81 (11.7)                       |                         |                          |
| HbA <sub>1c</sub> , % <sup>3 4</sup>             | 9.3 (1.2)                                    | 9.1 (1.0)                 | 9.5 (1.1)                       | .320                    | .018                     |
| SMBG <sup>5 1 2</sup>                            |                                              |                           |                                 |                         |                          |
| - >=7 times per day                              | 8 (9.6)                                      | 8 (16.7)                  | 5 (11.9)                        | .439                    | .627                     |
| - 1-6 times per day                              | 51 (61.4)                                    | 29 (60.4)                 | 24 (57.1)                       |                         |                          |
| - < every day                                    | 24 (28.9)                                    | 11 (22.9)                 | 13 (31.0)                       |                         |                          |

|                                           |             |             |             |      |      |
|-------------------------------------------|-------------|-------------|-------------|------|------|
| PAID <sup>6 3 4</sup>                     | 35.3 (18.7) | 36.8 (19.3) | 41.6 (24.4) | .696 | .355 |
| DDS <sup>7 3 4</sup> (sumscore)           | 31.9 (16.7) | 33.1 (16.4) | 37.3 (20.9) | .643 | .340 |
| DDS Emotional burden <sup>3 4</sup>       | 36.0 (22.5) | 36.9 (25.6) | 42.3 (26.0) | .985 | .297 |
| DDS Physician distress <sup>3 4</sup>     | 17.7 (19.9) | 18.1 (18.2) | 19.7 (23.1) | .826 | .990 |
| DDS Regimen distress <sup>3 4</sup>       | 45.8 (23.7) | 44.7 (21.8) | 53.9 (25.4) | .816 | .036 |
| DDS Interpersonal distress <sup>3 4</sup> | 21.0 (20.1) | 26.1 (19.3) | 24.9 (23.2) | .101 | .577 |
| PCDS <sup>8 3 4</sup>                     | 4.5 (1.6)   | 4.4 (1.4)   | 3.9 (1.6)   | .734 | .088 |
| RSES <sup>9 3 4</sup>                     | 19.6 (5.5)  | 19.5 (5.4)  | 19.0 (6.2)  | .876 | .624 |
| WHO5 <sup>10 3 4</sup>                    | 57.6 (18.6) | 60.9 (19.8) | 57.1 (20.5) | .338 | .468 |
| HCCQ <sup>11 3 4</sup>                    | 5.1 (1.4)   | 4.9 (1.6)   | 4.8 (1.6)   | .595 | .923 |
| TSRQ Autonomy <sup>12 3 4</sup>           | 5.2 (1.1)   | 5.4 (1.0)   | 4.9 (1.3)   | .754 | .088 |
| TSRQ Control <sup>13 3 4</sup>            | 3.2 (1.3)   | 3.5 (1.2)   | 3.1 (1.2)   | .073 | .061 |
| TSRQ RAI <sup>14 3 4</sup>                | 2.0 (1.3)   | 1.8 (1.5)   | 1.8 (1.7)   | .339 | .588 |

<sup>1</sup>N (%), <sup>2</sup>Chi-square ( $\chi^2$ ), <sup>3</sup>Mean (SD), <sup>4</sup>Mann-Whitney,

<sup>5</sup>Self-Monitoring Blood Glucose, <sup>6</sup>Problem Areas in Diabetes scale (range 0-100), <sup>7</sup>Diabetes Distress Scale (range 0-100), <sup>8</sup>Perceived Competence in Diabetes Scale (range 1-7), <sup>9</sup>Rosenberg Self-Esteem Scale (range 10-40), <sup>10</sup>WHO(5)Well-being Index (range 0-100), <sup>11</sup>Health Care Climate Questionnaire (range 1-7), <sup>12</sup>Treatment Self-Regulation Questionnaire, Autonomous motivation (range 1-7), <sup>13</sup>Treatment Self-Regulation Questionnaire, Controlled motivation (range 1-7), <sup>14</sup>Treatment Self-Regulation Questionnaire, Relative Autonomy Index (range 0-6)

**Table 2** Outcomes in control group and Guided-Self-Determination (GSD) intervention group (N=131)

|                                  | Within group change <sup>1</sup> |                       |         |                        |                       |         | Between groups change <sup>2</sup> |                                           |         |                             |                                           |         |
|----------------------------------|----------------------------------|-----------------------|---------|------------------------|-----------------------|---------|------------------------------------|-------------------------------------------|---------|-----------------------------|-------------------------------------------|---------|
|                                  | Control group<br>Mean (SD)       |                       |         | GSD group<br>Mean (SD) |                       |         | Model 1                            |                                           |         | Model 2                     |                                           |         |
|                                  | Baseline<br>(n = 83)             | Follow-up<br>(n = 83) | p-value | Baseline<br>(n = 48)   | Follow-up<br>(n = 48) | p-value | Effect<br>size <sup>3</sup>        | Group Difference <sup>4</sup><br>(95% CI) | p-value | Effect<br>size <sup>4</sup> | Group Difference <sup>4</sup><br>(95% CI) | p-value |
| <b>Primary Outcome</b>           |                                  |                       |         |                        |                       |         |                                    |                                           |         |                             |                                           |         |
| HbA <sub>1c</sub> % <sup>5</sup> | 9.3 (1.2)                        | 8.9 (1.3)             | <0.001  | 9.1 (1.0)              | 8.5 (1.1)             | <0.001  | 0.005                              | -0.15 (-0.45, 0.15)                       | .316    | 0.007                       | -0.18 (-0.48, 0.12)                       | .234    |
| HbA <sub>1c</sub> mmol/mol       | 78 (12.7)                        | 74 (14.1)             |         | 76 (10.4)              | 70 (11.7)             |         |                                    |                                           |         |                             |                                           |         |
| <b>Secondary outcomes</b>        |                                  |                       |         |                        |                       |         |                                    |                                           |         |                             |                                           |         |
| <b>Medical</b>                   |                                  |                       |         |                        |                       |         |                                    |                                           |         |                             |                                           |         |
| PCDS <sup>6</sup>                | 4.5 (1.6)                        | 4.7 (1.5)             | .305    | 4.4 (1.4)              | 4.7 (1.6)             | .071    | 0.003                              | 0.25 (-0.18, 0.67)                        | .247    | 0.003                       | 0.26 (-0.17, 0.70)                        | .229    |
| HCCQ <sup>7</sup>                | 5.1 (1.4)                        | 5.0 (1.4)             | .618    | 4.9 (1.6)              | 5.0 (1.6)             | .802    | 0.000                              | 0.04 (-0.46, 0.54)                        | .873    | 0.000                       | 0.03 (-0.48, 0.54)                        | .904    |
| <b>Type of motivation</b>        |                                  |                       |         |                        |                       |         |                                    |                                           |         |                             |                                           |         |
| TSRQ <sup>8</sup> Autonomy       | 5.2 (1.1)                        | 5.1 (1.1)             | .085    | 5.4 (1.0)              | 5.6 (0.9)             | .060    | 0.067                              | 0.53 (0.28, 0.79)                         | < .001  | 0.061                       | 0.51 (0.25, 0.77)                         | < .001  |
| TSRQ Control                     | 3.2 (1.3)                        | 3.1 (1.3)             | .532    | 3.5 (1.2)              | 3.3 (1.1)             | .072    | 0.000                              | 0.13 (-0.13, 0.40)                        | .321    | 0.000                       | 0.16 (-0.11, 0.43)                        | .237    |
| TSRQ Index                       | 2.0 (1.3)                        | 1.9 (1.2)             | .364    | 1.8 (1.5)              | 2.3 (1.3)             | .014    | 0.047                              | 0.40 (0.06, 0.73)                         | .020    | 0.038                       | 0.35 (0.01, 0.69)                         | .045    |

**Psychological**

|                            |             |             |      |             |             |      |       |                       |      |       |                       |      |
|----------------------------|-------------|-------------|------|-------------|-------------|------|-------|-----------------------|------|-------|-----------------------|------|
| PAID <sup>9</sup>          | 35.3 (18.7) | 34.2 (19.6) | .488 | 36.8 (19.3) | 29.8 (18.9) | .002 | 0.038 | -6.66 (-11.03, -2.29) | .003 | 0.043 | -6.96 (-11.40, -2.52) | .002 |
| DDS <sup>10</sup> overall  | 31.9 (16.7) | 30.4 (17.5) | .323 | 33.1 (16.4) | 27.9 (16.8) | .012 | 0.022 | -4.45 (-8.62, -0.27)  | .037 | 0.033 | -5.15 (-9.34, -0.96)  | .016 |
| DDS Emotional burden       | 36.0 (22.5) | 35.7 (24.4) | .995 | 36.9 (25.6) | 35.7 (24.4) | .019 | 0.035 | -6.92 (-12.82, -1.01) | .022 | 0.042 | -7.19 (-13.20, -1.19) | .019 |
| DDS Physician distress     | 17.7 (19.9) | 17.8 (19.0) | .864 | 18.1 (18.2) | 19.3 (19.7) | .337 | 0.001 | 1.14 (-4.38, 6.66)    | .684 | 0.000 | -0.41 (-5.80, 4.98)   | .880 |
| DDS Regimen distress       | 45.8 (23.7) | 40.2 (22.1) | .005 | 44.7 (21.8) | 36.8 (22.8) | .001 | 0.015 | -4.96 (-10.55, 0.64)  | .082 | 0.018 | -5.38 (-11.07, 0.32)  | .064 |
| DDS Interpersonal distress | 21.0 (20.1) | 22.2 (21.6) | .455 | 26.1 (19.3) | 22.8 (22.3) | .383 | 0.005 | -2.20 (-8.26, 3.87)   | .475 | 0.005 | -2.24 (-8.40, 3.91)   | .472 |
| RSES <sup>11</sup>         | 19.6 (5.5)  | 18.9 (5.5)  | .027 | 19.5 (5.4)  | 20.2 (4.8)  | .267 | 0.041 | 1.30 (0.22, 2.38)     | .018 | 0.048 | 1.43 (0.34, 2.52)     | .011 |
| WHO5 <sup>12</sup>         | 57.6 (18.6) | 56.3 (21.4) | .129 | 60.9 (19.8) | 60.6 (17.4) | .960 | 0.010 | 3.58 (-2.24, 9.40)    | .226 | 0.019 | 4.97 (-0.80, 10.75)   | .091 |

<sup>1</sup>All within group change values referred as t-tests

<sup>2</sup>Model 1: Adjusted for baseline value of outcome, Model 2: Adjusted for baseline value of outcome and sex

<sup>3</sup>Partial  $\eta^2$

<sup>4</sup>Unstandardized regression coefficient from linear regression adjusted for covariates, interpreted as difference in group means,.

<sup>5</sup>Within group- or between group change equal for HbA<sub>1c</sub> in per cent or mmol/mol

<sup>6</sup>Perceived Competence in Diabetes Scale, <sup>7</sup>Health Care Climate Questionnaire, <sup>8</sup>Treatment Self-Regulation Questionnaire, <sup>9</sup>Problem Areas in Diabetes scale, <sup>10</sup>Diabetes Distress Scale, <sup>11</sup>Rosenberg Self-Esteem Scale, <sup>12</sup>WHO (5) Well-being Index



**Table 3** Outcomes for Self-Monitoring Blood Glucose (SMBG) in control group and Guided Self-Determination (GSD) intervention group (N=131)

|                   | Within group change <sup>1</sup> |                       |         |                      |                       |         | Between groups change <sup>2,3</sup> |         |                    |         |
|-------------------|----------------------------------|-----------------------|---------|----------------------|-----------------------|---------|--------------------------------------|---------|--------------------|---------|
|                   | Control group<br>n (%)           |                       |         | GSD group<br>n (%)   |                       |         | Model 1                              |         | Model 2            |         |
|                   | Baseline<br>(n = 83)             | Follow-up<br>(n = 82) | p-value | Baseline<br>(n = 48) | Follow-up<br>(n = 47) | p-value | OR (95% CI)                          | p-value | OR (95% CI)        | p-value |
| <b>SMBG</b>       |                                  |                       |         |                      |                       |         |                                      |         |                    |         |
| >=7 times per day | 8 (9.6%)                         | 54 (65.9%)            | <0.001  | 8 (16.7%)            | 34 (72.3%)            | <0.001  | 1.02 (0.35, 2.95)                    | 0.971   | 0.92 (0.31, 2.74)  | 0.887   |
| 1-6 times per day | 51 (61.4%)                       | 10 (12.2%)            |         | 29 (60.4%)           | 8 (17.0%)             |         | 1                                    |         | 1                  |         |
| < daily           | 24 (28.9%)                       | 18 (22.0%)            |         | 11 (22.9%)           | 5 (10.6%)             |         | 3.38 (0.65, 17.58)                   | 0.148   | 3.12 (0.57, 16.97) | 0.189   |

<sup>1</sup>All within group change values referred as Chi-square (x<sup>2</sup>)

<sup>2</sup>Model 1: Adjusted for baseline value of outcome, Model 2: Adjusted for baseline value of outcome and sex

<sup>3</sup>Odds ratio from Multinomial Logistic regression

**Table 4** Associations between length of follow-up and change in primary outcome and significant secondary outcomes in the Guided-Self-Determination (GSD) intervention group

|                            | <b>n</b> | <b>Time to Follow-up<sup>1</sup></b><br><b>Mean (SD)</b> | <b>Change</b><br><b>Mean (SD)</b> | <b>B<sup>2</sup></b> | <b>p-value</b> |
|----------------------------|----------|----------------------------------------------------------|-----------------------------------|----------------------|----------------|
| HbA <sub>1c</sub> , %      | 87       | 16.1 (5.6)                                               | -0.51 (1.21)                      | -0.03                | .154           |
| PAID <sup>3</sup>          | 47       | 17.6 (3.6)                                               | -6.7 (13.8)                       | -0.2                 | .764           |
| DDS <sup>4</sup> Overall   | 47       | 17.6 (3.6)                                               | -5.4 (14.0)                       | -0.4                 | .542           |
| DDS Emotional burden       | 48       | 17.6 (3.6)                                               | -7.1 (20.1)                       | 0.1                  | .945           |
| RSES <sup>5</sup>          | 47       | 17.6 (3.6)                                               | 0.6 (3.5)                         | -0.1                 | .435           |
| TSRQ Autonomy <sup>6</sup> | 49       | 17.6 (3.6)                                               | 0.2 (0.9)                         | 0.03                 | .388           |

<sup>1</sup>Total follow-up time from date of randomization measured in months, <sup>2</sup>B=unstandardized regression coefficients

<sup>3</sup>Problem Areas in Diabetes scale, <sup>4</sup>Diabetes Distress Scale, <sup>5</sup>Rosenberg Self-Esteem Scale, <sup>6</sup>Treatment Self-Regulation Questionnaire, Autonomous motivation

## Acknowledgements

The authors wish to thank all of the diabetes specialist nurses at the outpatient clinic for their contribution to the data collection and the GSD-trained nurses for participating. We also wish to thank all study participants for their valuable contributions and psychiatrist Jorunn Torgauten, Haukeland University Hospital for her appreciated assistance to secure fidelity to the methodology and appropriate treatment to persons revealing profound psychological issues. We also wish to thank Jannicke Igland for her valuable contribution in revising the statistical analyses.

### a. Contributorship statement:

JM, MG, BR, VZ and HT contributed to conception and design of the study. JM collected the data. JM, JA and MP gave substantial contribution to the analysis and interpretation of data. JM wrote the first draft of this manuscript and MG, BR, and MP gave substantial contributions to the interpretation of data and revised the manuscript critically. VZ and HT gave substantial contributions to the intellectual content of the manuscript and revised the manuscript critically. All authors read and contributed to the final draft of the paper.

### b. Competing interests:

Conflict of interests: Author MP declared the following potential conflict of interest: Consulting fees from Astra Zeneca, Calibra, Lilly, and Novo Nordisk; advisory panel of GlaxcoSmithCline, Lilly, and Novo Nordisk; research grants from Novo Nordisk; Speaker for Novo Nordisk. The remaining authors declare that they have no conflict of interest.

1  
2  
3 **c. Funding:**  
4

5 The study was supported by The Western Norway Regional Health Authority; The  
6 Norwegian Diabetes Association; The Norwegian Nurses Organisation and Bergen  
7 University College.  
8  
9  
10

11  
12 **d. Data sharing statement:**  
13

14  
15 No additional data available  
16  
17  
18  
19  
20  
21  
22  
23  
24  
25  
26  
27  
28  
29  
30  
31  
32  
33  
34  
35  
36  
37  
38  
39  
40  
41  
42  
43  
44  
45  
46  
47  
48  
49  
50  
51  
52  
53  
54  
55  
56  
57  
58  
59  
60

## REFERENCES

1. Clark M. Diabetes self-management education: a review of published studies. *Prim Care Diabetes* 2008; **2**:113-120.
2. Haas L, Maryniuk M, Beck J, Cox CE, Duker P, Edwards L, *et al*. National standards for diabetes self-management education and support. *Diabetes Care* 2013; **36 Suppl 1**:S100-108.
3. Ryan RM, Deci EL. Self-determination theory and the facilitation of intrinsic motivation, social development, and well-being. *Am Psychol* 2000; **55**:68-78.
4. Peyrot M, Rubin RR, Funnell MM, Siminerio LM. Access to diabetes self-management education: results of national surveys of patients, educators, and physicians. *Diabetes Educ* 2009; **35**:246-248, 252-246, 258-263.
5. Peyrot M, Rubin RR, Lauritzen T, Snoek FJ, Matthews DR, Skovlund SE. Psychosocial problems and barriers to improved diabetes management: results of the Cross-National Diabetes Attitudes, Wishes and Needs (DAWN) Study. *Diabet Med* 2005; **22**:1379-1385.
6. Zoffmann V, Kirkevold M. Life versus disease in difficult diabetes care: conflicting perspectives disempower patients and professionals in problem solving. *Qual Health Res* 2005; **15**:750-765.
7. Livingstone SJ, Looker HC, Hothersall EJ, Wild SH, Lindsay RS, Chalmers J, *et al*. Risk of cardiovascular disease and total mortality in adults with type 1 diabetes: Scottish registry linkage study. *PLoS medicine* 2012; **9**:e1001321.
8. El Achhab Y, Nejari C, Chikri M, Lyoussi B. Disease-specific health-related quality of life instruments among adults diabetic: A systematic review. *Diabetes Res Clin Pract* 2008; **80**:171-184.
9. American Diabetes Association. Standards of medical care in diabetes--2007. *Diabetes Care* 2007; **30 Suppl 1**:S4-s41.
10. Muhlhauser I, Bruckner I, Berger M, Cheta D, Jorgens V, Ionescu-Tirgoviste C, *et al*. Evaluation of an intensified insulin treatment and teaching programme as routine management of type 1 (insulin-dependent) diabetes. The Bucharest-Dusseldorf Study. *Diabetologia* 1987; **30**:681-690.
11. Fitzpatrick SL, Schumann KP, Hill-Briggs F. Problem solving interventions for diabetes self-management and control: a systematic review of the literature. *Diabetes Res Clin Pract* 2013; **100**:145-161.
12. DAFNE Study Group. Training in flexible, intensive insulin management to enable dietary freedom in people with type 1 diabetes: dose adjustment for normal eating (DAFNE) randomised controlled trial. *Bmj* 2002; **325**:746.
13. Hopkins D, Lawrence I, Mansell P, Thompson G, Amiel S, Campbell M, *et al*. Improved biomedical and psychological outcomes 1 year after structured education in flexible insulin therapy for people with type 1 diabetes: the U.K. DAFNE experience. *Diabetes Care* 2012; **35**:1638-1642.
14. Hermanns N, Kulzer B, Ehrmann D, Bergis-Jurgan N, Haak T. The effect of a diabetes education programme (PRIMAS) for people with type 1 diabetes: results of a randomized trial. *Diabetes Res Clin Pract* 2013; **102**:149-157.
15. Muller N, Kloos C, Samann A, Wolf G, Muller UA. Evaluation of a treatment and teaching refresher programme for the optimization of intensified insulin therapy in type 1 diabetes. *Patient Educ Couns* 2013; **93**:108-113.
16. Zoffmann V, Kirkevold M. Realizing empowerment in difficult diabetes care: a guided self-determination intervention. *Qual Health Res* 2012; **22**:103-118.
17. Olesen ML, Duun-Henriksen AK, Hansson H, Ottesen B, Andersen KK, Zoffmann V. A person-centered intervention targeting the psychosocial needs of gynecological cancer survivors: a randomized clinical trial. *Journal of cancer survivorship : research and practice* 2016.
18. Zoffmann V, Lauritzen T. Guided self-determination improves life skills with type 1 diabetes and A1C in randomized controlled trial. *Patient Educ Couns* 2006; **64**:78-86.
19. Zoffmann V, Vistisen D, Due-Christensen M. Flexible guided self-determination intervention for younger adults with poorly controlled Type 1 diabetes, decreased HbA and psychosocial distress in women but not in men: a real-life RCT. *Diabet Med* 2015.

20. Husted GR, Thorsteinsson B, Esbensen BA, Glud C, Winkel P, Hommel E, *et al.* Effect of guided self-determination youth intervention integrated into outpatient visits versus treatment as usual on glycemic control and life skills: a randomized clinical trial in adolescents with type 1 diabetes. *Trials* 2014; **15**:321.
21. Zoffmann V, Prip A, Christiansen AW. Dramatic change in a young woman's perception of her diabetes and remarkable reduction in HbA1c after an individual course of Guided Self-Determination. *BMJ Case Rep* 2015; **2015**.
22. Zoffmann V, Harder I, Kirkeveld M. A person-centered communication and reflection model: sharing decision-making in chronic care. *Qual Health Res* 2008; **18**:670-685.
23. Mohn J, Graue M, Assmus J, Zoffmann V, H BT, Peyrot M, *et al.* Self-reported diabetes self-management competence and support from healthcare providers in achieving autonomy are negatively associated with diabetes distress in adults with Type 1 diabetes. *Diabet Med* 2015.
24. Hoelzel W, Weykamp C, Jeppsson JO, Miedema K, Barr JR, Goodall I, *et al.* IFCC reference system for measurement of hemoglobin A1c in human blood and the national standardization schemes in the United States, Japan, and Sweden: a method-comparison study. *Clinical chemistry* 2004; **50**:166-174.
25. Hermanns N, Kulzer B, Krichbaum M, Kubiak T, Haak T. How to screen for depression and emotional problems in patients with diabetes: comparison of screening characteristics of depression questionnaires, measurement of diabetes-specific emotional problems and standard clinical assessment. *Diabetologia* 2006; **49**:469-477.
26. Polonsky WH, Fisher L, Earles J, Dudl RJ, Lees J, Mullan J, *et al.* Assessing psychosocial distress in diabetes: development of the diabetes distress scale. *Diabetes Care* 2005; **28**:626-631.
27. Williams GC, McGregor HA, King D, Nelson CC, Glasgow RE. Variation in perceived competence, glycemic control, and patient satisfaction: relationship to autonomy support from physicians. *Patient Educ Couns* 2005; **57**:39-45.
28. Alessandri G, Vecchione M, Eisenberg N, Laguna M. On the factor structure of the Rosenberg (1965) General Self-Esteem Scale. *Psychological assessment* 2015; **27**:621-635.
29. Hajos TR, Pouwer F, Skovlund SE, Den Oudsten BL, Geelhoed-Duijvestijn PH, Tack CJ, *et al.* Psychometric and screening properties of the WHO-5 well-being index in adult outpatients with Type 1 or Type 2 diabetes mellitus. *Diabet Med* 2013; **30**:e63-69.
30. Williams GC, McGregor HA, Zeldman A, Freedman ZR, Deci EL. Testing a self-determination theory process model for promoting glycemic control through diabetes self-management. *Health Psychol* 2004; **23**:58-66.
31. Levesque CS, Williams GC, Elliot D, Pickering MA, Bodenhamer B, Finley PJ. Validating the theoretical structure of the Treatment Self-Regulation Questionnaire (TSRQ) across three different health behaviors. *Health Educ Res* 2007; **22**:691-702.
32. World Health Organization. Process of translation and adaptation of instruments. 2015.
33. Devries JH, Snoek FJ, Heine RJ. Persistent poor glycaemic control in adult Type 1 diabetes. A closer look at the problem. *Diabet Med* 2004; **21**:1263-1268.
34. Hill-Briggs F, Gemmell L. Problem solving in diabetes self-management and control: a systematic review of the literature. *Diabetes Educ* 2007; **33**:1032-1050; discussion 1051-1032.
35. Bott U, Bott S, Hemmann D, Berger M. Evaluation of a holistic treatment and teaching programme for patients with Type 1 diabetes who failed to achieve their therapeutic goals under intensified insulin therapy. *Diabet Med* 2000; **17**:635-643.
36. Rogvi S, Tapager I, Almdal TP, Schiotz ML, Willaing I. Patient factors and glycaemic control--associations and explanatory power. *Diabet Med* 2012; **29**:e382-389.
37. Shadish WR, Cook TD, Campbell DT. Experimental and quasi-experimental designs for generalized causal inference. New York: Houghton Mifflin Company; 2002.
38. Zagarins SE, Allen NA, Garb JL, Welch G. Improvement in glycemic control following a diabetes education intervention is associated with change in diabetes distress but not change in depressive symptoms. *J Behav Med* 2012; **35**:299-304.

- 1  
2  
3 39. van Son J, Nyklicek I, Pop VJ, Blonk MC, Erdtsieck RJ, Spooren PF, *et al*. The effects of a  
4 mindfulness-based intervention on emotional distress, quality of life, and HbA(1c) in outpatients with  
5 diabetes (DiaMind): a randomized controlled trial. *Diabetes Care* 2013; **36**:823-830.  
6 40. Nicolucci A, Kovacs Burns K, Holt RI, Comaschi M, Hermanns N, Ishii H, *et al*. Diabetes  
7 Attitudes, Wishes and Needs second study (DAWN2TM): cross-national benchmarking of diabetes-  
8 related psychosocial outcomes for people with diabetes.[Erratum appears in Diabet Med. 2013  
9 Oct;30(10):1266]. *Diabet Med* 2013; **30**:767-777.  
10 41. Gonzales R, Handley MA. Improving glycemic control when "usual" diabetes care is not  
11 enough. *Arch Intern Med* 2011; **171**:1999-2000.  
12 42. Barnard KD, Lloyd CE, Dyson PA, Davies MJ, O'Neil S, Naresh K, *et al*. Kaleidoscope model of  
13 diabetes care: time for a rethink? *Diabet Med* 2014; **31**:522-530.  
14  
15  
16  
17  
18  
19  
20  
21  
22  
23  
24  
25  
26  
27  
28  
29  
30  
31  
32  
33  
34  
35  
36  
37  
38  
39  
40  
41  
42  
43  
44  
45  
46  
47  
48  
49  
50  
51  
52  
53  
54  
55  
56  
57  
58  
59  
60

For peer review only

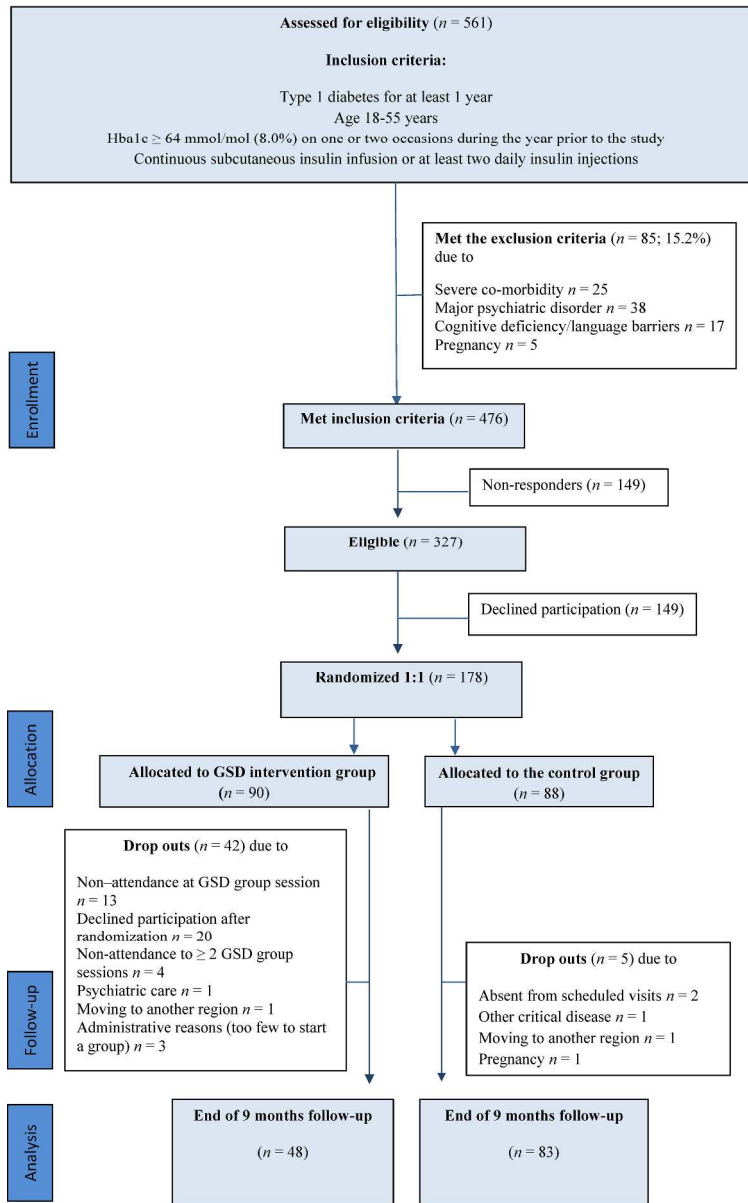

Fig. 1. Study flow diagram

268x427mm (300 x 300 DPI)
